1 **TITLE:**

2

3 Complementary coding of behaviors in striatal pathways supports a dual selection-  
4 suppression function

5

6

7 **AUTHORS:**

8

9 Christophe Varin, Amandine Cornil, Delphine Houtteman, Patricia Bonnavion, Alban de  
10 Kerchove d'Exaerde\*

11

12 **AFFILIATION:**

13

14 Université Libre de Bruxelles (ULB), ULB Neuroscience Institute, Neurophysiology  
15 Laboratory; Brussels, Belgium

16 \*Corresponding author ([adekerch@ulb.ac.be](mailto:adekerch@ulb.ac.be))

17

18 **ABSTRACT:**

19

20 The basal ganglia are known to control actions and modulate movements. Neuronal activity in  
21 the two efferent pathways of the dorsal striatum, a major input to the basal ganglia, is critical  
22 for appropriate behavioral control. Previous evidence has led to divergent conclusions on the  
23 respective engagement of both pathways during actions. We used calcium imaging to evaluate  
24 how neurons in the direct and indirect pathways in the dorsal striatum encode behaviors  
25 during self-paced spontaneous explorations in an open field. We observed that the two striatal  
26 pathways exhibit distinct tuning properties during spontaneous behaviors. We applied  
27 supervised learning algorithms and found that direct pathway neurons encode behaviors  
28 through their activation, whereas indirect pathway neurons exhibit behavior-specific  
29 silencing. These properties remain stable for weeks. Our findings highlight a complementary  
30 encoding of behaviors in the two striatal pathways that supports an updated model,  
31 reconciling previous conflicting conclusions on motor encoding in the striatum.

32

## 1 INTRODUCTION:

2

3 The basal ganglia are certainly well known to control both goal-directed behaviors and  
4 natural, self-paced behaviors. The proper initiation and execution of these behaviors relies  
5 heavily on appropriate functioning within the basal ganglia, as basal ganglia dysfunction is at  
6 the core of various disorders, including Parkinson's disease, autism spectrum disorders, and  
7 schizophrenia<sup>1</sup>. The striatum, which is the main entry nucleus of the basal ganglia, consists of  
8 two types of striatal projection neurons (SPNs) that differ based on their expression of either  
9 dopamine D1 or D2 receptors and their respective direct or indirect projections to the output  
10 nuclei of the basal ganglia (dSPNs or iSPNs). This functional organization provides differential  
11 control of basal ganglia outputs by dSPNs or iSPNs, that leads to net activating or inhibiting  
12 effects of thalamocortical circuits, respectively<sup>2,3</sup>. This dichotomy between prokinetic dSPNs  
13 and antikinetic iSPNs has been documented using loss-of-function or gain-of-function  
14 experiments<sup>4-10</sup>, bolstering the traditional go/no-go description of striatal functioning<sup>2,3</sup>. This  
15 view has been challenged by correlative descriptions of striatal activity based on recordings of  
16 both types of SPNs, which demonstrated a coactivation of the dSPN and iSPN pathways during  
17 locomotion and more generally during actions<sup>11-16</sup>. These results indicate that concerted and  
18 cooperative activity between both striatal pathways is needed for proper action initiation and  
19 execution.

20 As a result, two antagonistic models of striatal functioning have been developed that explain  
21 how neuronal activity is organized in the striatum. The selection-suppression model<sup>17</sup>  
22 postulates that proper action execution relies on the concurrent activation of a small discrete  
23 subpopulation of dSPNs that encode the ongoing action and the widespread activation of a  
24 large number of iSPNs that inhibit all other actions, with the iSPNs associated with the  
25 ongoing action remaining silent. This model predicts that dSPNs are more selective for actions  
26 than iSPNs. However, recent investigations highlighted that both pathways encode behaviors  
27 with similar properties and dynamics<sup>13-16</sup>. Consequently, a cooperative selection model was  
28 proposed<sup>13</sup> in which dSPNs and iSPNs coordinate their activities to select the proper action,  
29 with subsets of dSPNs and iSPNs displaying the same targeted activation patterns toward  
30 actions. Although this model considers the coactivation of small ensembles of dSPNs and  
31 iSPNs, this model likely fails to take into account the functional opposition between dSPNs  
32 and iSPNs<sup>4-10</sup>. In summary, these models predict different patterns of neuronal activation in  
33 response to various behaviors, particularly the activity of iSPNs. Therefore, additional  
34 investigations are needed to clarify the function of the two SPN pathways as well as their  
35 relative organization into functional subpopulations for behavior encoding.

36 Here, we studied the behavior-encoding properties of dSPNs and iSPNs in the dorsal striatum  
37 using one-photon microendoscopy in mice that freely explored an open field and thus  
38 expressed a large behavioral repertoire at their own pace. We observed that the behavior-  
39 encoding properties of dSPNs and iSPNs differ in a way that challenges the above models.  
40 Furthermore, we used support vector machine classifiers to precisely analyze the neural code  
41 of dSPNs and iSPNs and their activation patterns during behaviors. We found that, despite  
42 their differences in encoding properties, both populations contain the same amount of  
43 information to reliably infer behaviors. Moreover, we classified neurons as activated or silent  
44 during behaviors to evaluate the predictions of the selection-suppression and cooperative  
45 selection models, and we found that neural codes are organized differently in dSPNs and

1 iSPNs. Similar to previous observations in different brain systems, the most important  
2 behavior-encoding feature of dSPNs is their specific activation during some behaviors.  
3 Remarkably, the most important behavior-encoding feature of iSPNs is their consistent  
4 silencing during specific behaviors. Our findings are reinforced by observations that these  
5 properties remain stable for weeks. These results provide the first correlative evidence that  
6 dSPNs and iSPNs have distinct encoding properties, supporting an updated model for motor  
7 encoding among SPNs in the dorsal striatum that relies on the congruent activation of dSPNs,  
8 which encode multiple accessible behaviors in a given context to promote these behaviors,  
9 and iSPNs, which encode for and inhibit competing behaviors. As a result, the coactivation of  
10 specific subsets of dSPNs and iSPNs would result in the selection and execution of only one  
11 motor program. This updated model bridges the gap between various interpretations of  
12 experimental observations that promoted antagonistic models on striatal functional  
13 organization.

14

15

## 16 **RESULTS:**

17

### 18 **Behavior encoding properties differ between dSPNs and iSPNs**

19 To investigate the behavior-encoding properties in both subpopulations in the dorsal  
20 striatum, we tracked and reconstructed the behavior of mice freely exploring an open field  
21 and simultaneously recorded the neuronal activity of either dSPNs or iSPNs using  
22 microendoscopic one-photon imaging of GCaMP6s (Fig. 1a). Mouse self-paced behaviors were  
23 identified and labeled using a combination of deep learning tools and clustering methods to  
24 generate a predictive model (Fig. 1b, Extended Data Figs. 1 and 2a-c). The behavior  
25 distributions of the experimental groups were similar. The calcium activity was extracted  
26 from simultaneously recorded microendoscopic images using the CalmAn pipeline<sup>18,19</sup>, and  
27 the reconstructed temporal traces of calcium activity were deconvolved using MLspike<sup>20</sup> (Fig.  
28 1c-f, Extended Data Figs. 1 and 2d-k). On average,  $179 \pm 18$  dSPNs and  $216 \pm 16$  iSPNs were  
29 identified in each recording session (Fig. 1f). First, we observed that the average population  
30 activity of the dSPNs was higher than that of the iSPNs (Fig. 1f). Then, the population activity  
31 was decomposed according to the identified behaviors, which revealed that the average  
32 population activity was consistently higher for dSPNs than for iSPNs during many behaviors,  
33 including straight locomotion, locomotion with right and left turns, remaining still with right  
34 and left turns, rearing, grooming, and locomotion sniffing, with the notable exception of  
35 immobility, during which the average population activity was significantly lower for dSPNs  
36 than for iSPNs (Fig. 1g). This result indicates a substantial difference in the behavioral tuning  
37 properties of dSPN and iSPN ensembles.

38 To better characterize this potential difference among the SPN subpopulations, we first  
39 evaluated whether SPN activation was consistent during 30 min of open-field exploration. For  
40 each behavior, we computed the neuronal activation, which was calculated as the average  
41 frequency, during the first and the second halves of each recording, and we evaluated the  
42 similarity between these two neuronal activation maps (Fig. 2a). We observed that neuronal  
43 activation similarity was higher for dSPNs than for iSPNs for all identified behaviors except  
44 grooming, still sniffing, and immobility (Fig. 2b, Extended Data Fig. 3a,b). This result suggests  
45 that, for each behavior, the same dSPNs are more consistently activated, whereas iSPN

1 activation is inconsistent. Conversely, this observation between the first and second halves of  
2 the recordings could result from the fact that both subpopulations are differentially affected  
3 by internal drives that accumulate or dissipate during open-field exploration, such as stress<sup>21</sup>,  
4 novelty<sup>22,23</sup>, or tiredness<sup>24</sup>. To account for this temporal factor, we computed the same  
5 similarity metric by using all possible partitions of time into two 15-min sets (e.g., 30 min  
6 segmented into 5 min long slices). Regardless of the time partition, we observed the same  
7 difference in neuronal activation similarity between dSPNs and iSPNs (Extended Data Fig. 3c).  
8 Furthermore, the neuronal activation similarity was computed by comparing odd and even  
9 frames and by comparing one episode out of two to complementary episodes, yielding the  
10 same observations as described above (Extended Data Fig. 3d,e). Moreover, as an additional  
11 control to verify the reliability of the similarity measure, we disturbed SPN signaling by  
12 artificially increasing dopamine release through acute injection of amphetamine. The  
13 neuronal activation similarity of both dSPNs and iSPNs was strongly alleviated after  
14 amphetamine administration (Extended Data Fig. 4a,b). All the above results demonstrate  
15 that the difference in neuronal activation similarity is a substantiated time-invariant property  
16 of behavior encoding in dSPNs and iSPNs; for each behavior, the same dSPNs are more  
17 consistently activated, whereas iSPN activation displays either a milder specificity toward  
18 behaviors or is more variable.

19 Moreover, a comparison of pairs of behaviors revealed that in the dorsal striatum, similar  
20 behaviors are encoded by highly similar neuronal ensembles, whereas dissimilar behaviors  
21 are encoded by mildly overlapping neuron groups. Furthermore, this encoding property is  
22 equivalent for both SPN subtypes<sup>14</sup>. For each pair of behaviors, we compared the similarity  
23 between the average neuronal activity (neuronal activation similarity) to the similarity  
24 between behaviors (behavioral similarity). The latter quantifies the similarity in movement  
25 trajectories and body shape between each pair of behaviors. We observed a strong positive  
26 correlation between pairwise neuronal activation similarity and pairwise behavioral  
27 similarity for both dSPNs and iSPNs (Fig. 2a,c-e). However, when the correlation coefficients  
28 of pairwise neuronal and behavioral similarities were compared, we observed a significantly  
29 higher correlation for dSPNs than for iSPNs (Fig. 2f). This result indicates that the behavioral  
30 space representation differs between the two populations. This result contradicts that of a  
31 previous report<sup>14</sup>. To understand this result, we first verified that this difference was not due  
32 to the use of a different neuronal similarity measure (Extended Data Fig. 5a). Another key  
33 difference is the duration over which animals explored the open field: the animals explored  
34 the field for 10-15 min in Klaus, Martins et al., 2017<sup>14</sup>, whereas our experiments lasted 30  
35 min. Thus, we calculated the correlation coefficients between the neuronal and behavioral  
36 similarities for different recording lengths. No difference was detected between dSPNs and  
37 iSPNs for durations of up to 10 min (Extended Data Fig. 5b-d). Therefore, extended recordings  
38 may be required to collect more samples of neuronal activity during a larger variety of  
39 internal or external contexts in order to properly uncover differences in neuronal activation  
40 variability for episodes of different behaviors. Overall, these results demonstrate that the  
41 coupling between behavior similarity and neuronal similarity is tighter among dSPNs than  
42 among iSPNs.

43 The above observations demonstrate fundamental differences between dSPNs and iSPNs in  
44 terms of their dynamical behavior-encoding properties. Moreover, this new set of evidence is  
45 inconsistent with existing models of striatal organization. In particular, these models do not

1 account for the existence of different neuronal activation patterns during different episodes of  
2 the same behavior. Thus, our results call for a deeper analysis of the neural codes and  
3 properties of dSPNs and iSPNs that may convey different behavior-relevant information.

### 5 **Behaviors can be reliably decoded from either dSPNs or iSPNs**

6 The first step in our analysis of the neural code in the dorsal striatum was to assess whether  
7 animal behaviors can be reconstructed based on instantaneous neuronal activity recorded  
8 from either dSPNs or iSPNs. We thus trained several support vector machine linear classifiers  
9 for each pair of behaviors and used the majority rule to combine the outputs of individual  
10 classifiers to predict animal behavior (one vs. one multiclass support vector machine) (Fig.  
11 3a). The behavior reconstruction error was calculated for each prediction using the  
12 behavioral distance between the predicted behavior and the actual behavior. The  
13 instantaneous prediction of behaviors using either dSPN or iSPN activity performs  
14 significantly better than chance, which was estimated by decoding behaviors using classifiers  
15 trained on time-lagged data. Moreover, dSPNs and iSPNs have similar decoding accuracies and  
16 average reconstruction errors (Fig. 3b,c). The prediction accuracy associated with individual  
17 classifiers (separation between pairs of behaviors) is similar for dSPNs ( $81.8 \pm 1.1\%$ ) and  
18 iSPNs ( $82.5 \pm 0.8\%$ ) ( $p = 0.295$ ). Strikingly, this result appears to contradict previous  
19 observations, which indicate differences in behavior encoding between dSPNs and iSPNs. A  
20 lower prediction accuracy would be expected when using iSPNs (because of their lower  
21 activation similarity) and a larger prediction error would be expected when using iSPNs  
22 (because of the lower coupling between pairwise neuronal and behavioral similarities). To  
23 confirm the relevance and robustness of our classification strategy, we evaluated whether the  
24 decoding accuracy is affected when SPN activity is strongly disturbed after amphetamine  
25 administration. We observed that the decoding performance was considerably reduced  
26 following amphetamine administration (Extended Data Fig. 4a, c-d). A closer inspection of the  
27 performance of individual classifiers revealed that the decoding accuracy was higher when  
28 distinguishing dissimilar behaviors, and lower when distinguishing similar behaviors (Fig.  
29 3d). This property is the same for dSPNs and iSPNs. For example, for dSPNs, the separation  
30 between considerably different behaviors, such as locomotion turn right and immobility  
31 (behavior distance:  $3.93 \pm 0.06$ ), is more accurate (accuracy:  $90.2 \pm 1.1\%$ ) than the separation  
32 between more similar behaviors, such as locomotion turn right and locomotion turn left  
33 (behavior distance:  $1.79 \pm 0.06$ ; accuracy:  $76.1 \pm 1.3\%$ ). These results indicate that despite  
34 previous evidence on differences in dynamical behavior encoding, both striatal populations  
35 contain and encode the same amount of information in response to behaviors.

### 37 **Neural code in dSPNs is biased toward activation**

38 To better characterize the neural code in the dorsal striatum, we attempted to identify which  
39 features in the response properties of individual cells contribute most to behavior encoding.  
40 We first identified which neurons were significantly activated during specific behaviors and  
41 defined these neurons as behavior-active when the mutual information between the behavior  
42 time series and the recorded neuronal activity (behavior information) was statistically  
43 significant<sup>25,26</sup> (Fig. 4a,b, Extended Data Fig. 6a,b). Based on this criterion, the proportion of  
44 behavior-active cells is higher among dSPNs than among iSPNs (Fig. 4b, Extended Data Fig.  
45 6c). According to this classification of whether individual neurons are behavior-active, we

1 evaluated whether behaviors could be decoded based on the activity of behavior-active or  
2 non-behavior-active neurons. For dSPN recordings, the prediction was significantly more  
3 efficient when using behavior-active cells than when using non-behavior-active cells, whereas,  
4 for iSPN recordings, the prediction performance was similar when either behavior-active cells  
5 or non-behavior-active cells were used (Fig. 4c,d, Extended Data Fig. 6d,e). Moreover, the  
6 decoding performance was similar when non-behavior-active dSPNs or iSPNs were used,  
7 whereas the decoding performance was significantly higher when behavior-active dSPNs  
8 were used than when behavior-active iSPNs were used (Fig. 4c,d). This observation was  
9 maintained when the level of significance of behavior information for classifying neurons as  
10 behavior-active was changed (Extended Data Fig. 6f). Taken together, these findings  
11 demonstrate that the neural code for behaviors is biased toward behavior-active dSPNs,  
12 whereas this feature is more evenly distributed among iSPNs.

13

#### 14 **Neural code in iSPNs is biased toward silencing**

15 According to the selection-suppression model<sup>17</sup>, indirect pathway SPNs are activated to  
16 suppress all motor programs except the one being executed. As a result, iSPNs responsible for  
17 suppressing a particular behavior are never active during this behavior. Thus, following this  
18 postulate, we investigated the relative contribution of neurons that remain silent during  
19 behaviors to the neural code. We thus identified SPNs that are consistently silent during  
20 episodes of each behavior by computing, for each neuron, how often this neuron is active  
21 during all episodes of this behavior (Fig. 5a). For each behavior, if this activation occurrence is  
22 sufficiently low (threshold of 2.5% of episodes; Fig. 5a), the neuron is labeled as behavior-  
23 silent for this behavior. Strikingly, the proportion of behavior-silent neurons was higher in  
24 iSPNs than in dSPNs for each behavior (Fig. 5b), with the notable exception of immobility, for  
25 which the proportion was similar in dSPNs and iSPNs. Then, we separated SPNs classified as  
26 behavior-silent or non-behavior-silent and evaluated the information content of these groups  
27 of cells to accurately separate the associated behavior from other behaviors (one behavior vs.  
28 rest decoding accuracy) (Fig. 5c). For dSPNs, the separation accuracy of all behaviors was  
29 similar when behavior-silent cells or non-behavior-silent cells were used, except fast  
30 locomotion and immobility. On the other hand, we observed that the separation accuracy was  
31 consistently higher for behavior-silent iSPNs than non-behavior-silent iSPNs during  
32 ambulatory behaviors (e.g., behaviors involving locomotion or right and left turns without  
33 locomotion), indicating that silencing is an important feature of the neural code in iSPNs  
34 during these behaviors. Conversely, this difference in separation accuracy between behavior-  
35 silent and non-behavior-silent iSPNs was not observed for static behaviors (e.g., head up,  
36 rearing, grooming, still sniffing, and immobility). This distinction between ambulatory and  
37 static behaviors could be because the detected static behaviors may contain additional  
38 substates that were not separated in our classification. Furthermore, this distinction may  
39 represent different modes of encoding in iSPNs during ambulatory and static behaviors, such  
40 as spatial mapping in the dorsal hippocampus, which is characterized by place cells that  
41 display their specific place fields mostly during locomotion<sup>27,28</sup>. Additionally, we observed the  
42 same results for both dSPNs and iSPNs when we used an alternate cell classification, which  
43 was based on a threshold on the average activity during behaviors (Extended Data Fig. 7). In  
44 conclusion, these observations support a key distinctive feature of iSPNs for behavior

1 encoding, namely, that iSPNs are consistently silent during behaviors, a property that is not  
2 observed for dSPNs.

### 3 4 **Long-term stability of neural code over weeks**

5 To reinforce our previous findings and assess their reliability, we investigated their long-term  
6 stability. Thus, for each animal, we performed a longitudinal registration of neurons<sup>29</sup> across  
7 pairs of recording sessions over one month (Extended Data Figs. 1 and 8a). The registration  
8 performance was similar for dSPN and iSPN recordings (Extended Data Fig. 8b). On average,  
9  $104 \pm 5$  cells were recovered between any pair of sessions (Extended Data Fig. 8c),  
10 corresponding to an overlap of  $33.9 \pm 0.8\%$  in the subset of cells identified in both sessions,  
11 ranging from  $36.2 \pm 1.5\%$  after approximately 5-7 days to  $32.5 \pm 1.4\%$  after approximately 30  
12 days. As described above, we first quantified the neuronal activation similarity for each  
13 behavior between pairs of sessions. For all behaviors, the neuronal activation similarity was  
14 higher for dSPNs and iSPNs than for their respective shuffles, as evaluated by either random  
15 permutations of registered cell pairs or by replacing one cell or each pair with its closest  
16 neighbor (Extended Data Fig. 8d,e). These controls provide an additional post-hoc validation  
17 of the longitudinal registration procedure. Then, comparisons between dSPNs and iSPNs  
18 revealed that, with the exception of immobility, the neuronal activation similarity was  
19 consistently higher over time for dSPNs than for iSPNs (Fig. 6a, Extended Data Fig. 8d,e). This  
20 result appears to indicate that neuronal activation patterns are preserved better for dSPNs  
21 than for iSPNs, which may reflect the previously established bias toward activation in the  
22 neuronal code of behaviors in dSPNs.

23 Following this idea, we evaluated the stability of the behavior-coding properties across  
24 sessions by comparing the classification of cells into the behavior-excited or behavior-silent  
25 categories using the Jaccard index (intersection over union) for binary attributes. We  
26 observed that within registered cells between pairs of sessions, the proportion of neurons  
27 that remained classified as behavior-active for the same behaviors was higher among dSPNs  
28 than among iSPNs (Fig. 6b). Conversely, during ambulatory behaviors, behavior-silent iSPNs  
29 overlapped between sessions more often than behavior-silent dSPNs (Fig. 6b, Extended Data  
30 Fig. 9c). This result indicates that the classification of dSPNs as behavior-active and the  
31 classification of iSPNs as behavior-silent are more consistent over time than their respective  
32 counterparts in the other striatal population.

33 To deepen this observation on the categorization of single neurons and extend it to neural  
34 ensembles, we quantified whether support vector machines trained on neuronal activity and  
35 behavior time series on a given day can efficiently predict the behavior using the neuronal  
36 activity of the same neurons on a different day. For both dSPNs and iSPNs, the longitudinal  
37 prediction of behaviors using support vector machines is consistently more accurate than the  
38 predictions obtained with classifiers trained on time-lagged data (Fig. 6c, Extended Data Fig.  
39 9a,b). Interestingly, the longitudinal prediction of behaviors performs better with dSPNs than  
40 with iSPNs, which might reflect the higher long-term stability of neuronal activation similarity  
41 for dSPNs.

42 Finally, we analyzed whether the activity of dSPNs and iSPNs categorized as behavior-active  
43 or behavior-silent on a given day can be used to efficiently predict behaviors on a different  
44 day. We observed that for dSPNs, behavior predictions were significantly more accurate when  
45 only behavior-active cells were used than when non-behavior-active cells were used (Fig. 6d).

1 In contrast, the accuracy is similar when behaviors are predicted with either behavior-active  
2 iSPNs or non-behavior-active iSPNs (Fig. 6d). This finding indicates that the bias of the neural  
3 code toward behavior-active dSPNs and the information content of these cells in response to  
4 behaviors remain conserved for weeks. For behavior-silent neurons (or behavior-inactive  
5 neurons, using the alternate definition), we noted that the prediction of ambulatory behaviors  
6 is significantly more accurate with behavior-silent iSPNs than with non-behavior-silent cells  
7 (Fig. 6e, Extended Data Fig. 9d), whereas no difference was observed for static behaviors. On  
8 the other hand, there is no difference in the prediction accuracy when either behavior-silent  
9 or non-behavior-silent dSPNs are used (Fig. 6e, Extended Data Fig. 9d). This finding highlights  
10 the long-term preservation of the bias toward behavior-silent iSPNs in the striatal neural  
11 code. Overall, these results demonstrate the long-term stability of the neuronal encoding  
12 properties established in individual recording sessions, reinforcing the reliability of our  
13 findings.

14  
15 Thus, our findings demonstrate that neuronal representations of spontaneous self-paced  
16 behaviors in striatal ensembles are biased toward activation in dSPNs and silencing in iSPNs  
17 and that these representations are preserved for weeks. These results provide new original  
18 insights into both the neuronal organization of striatal ensembles for behavior encoding and  
19 efficient motor program selection. In addition, our observations allow us to propose an  
20 updated model for behavior encoding in the two striatal pathways that solves discrepancies  
21 raised by previously formulated hypotheses.

22

23

## 24 **DISCUSSION:**

25

26 Neurons in the dorsal striatum exhibit diverse and heterogeneous responses to different  
27 external variables<sup>11,13,14,30</sup>. These responses cannot be easily interpreted and highlight the  
28 challenge of identifying the distinct encoding properties of the two parallel efferent pathways  
29 in the dorsal striatum. In this study, we evaluated the neuronal encoding properties of SPN  
30 ensembles during self-paced natural behaviors in an open field. In this experimental  
31 paradigm, animals can express unconstrained naturalistic behaviors forming a large  
32 behavioral repertoire. In our experiments, we observed previously unreported differences  
33 between direct and indirect pathway SPNs. These differences most likely reflect the higher  
34 variability of iSPNs in neuron ensembles that are activated during different episodes of the  
35 same behavior, which could be observed only during long sessions of open-field exploration.  
36 However, despite these heterogeneous response properties, the behaviors could be reliably  
37 decoded from the activity of either dSPNs or iSPNs, demonstrating that both pathways contain  
38 the same level of information with respect to the ongoing behaviors. Therefore, it questions  
39 the respective organization of the neural code in both pathways.

40

41 Many formulations have been proposed to explain the organization of neuronal activity in the  
42 two striatal pathways. Among them, a “complete selection-suppression” model proposes  
43 prokinetic and antikinetic functions for the direct and indirect pathways, respectively<sup>4-6,17</sup>  
44 (Extended Data Fig. 10a). This model proposes that proper motor program execution relies on  
45 the congruent activation of a small discrete subpopulation of dSPNs that encode this motor



1 program and a large number of iSPN ensembles associated with all other motor programs that  
2 inhibit all other behaviors. Such a model predicts that dSPNs are more selective for actions  
3 than iSPNs, which is inconsistent with observations in previous reports<sup>11,14-16</sup> and our results.  
4 However, this model is compatible with our observation that the neural code among dSPNs is  
5 biased toward activation, whereas the neural code is biased toward inhibition in iSPNs  
6 because during a given behavior, dSPNs associated with this behavior are activated, whereas  
7 iSPNs associated with the same behavior remain silent (Extended Data Fig. 10d). On the other  
8 hand, the “cooperative selection” model<sup>13</sup> (Extended Data Fig. 10b) proposes the cooperative  
9 activation of discrete dSPNs and iSPNs ensembles that are similarly tuned toward behaviors  
10 to select proper motor programs. Although this model accurately incorporates the  
11 coactivations of similar size dSPN and iSPN ensembles during actions, it does not account for  
12 the functional dissimilarities of dSPNs and iSPNs<sup>4-6</sup> or our observations of dissimilar encoding  
13 dynamics between the two striatal pathways, in particular the bias toward silencing in iSPNs  
14 (Extended Data Fig. 10d). As a result, the current models of striatal organization must be  
15 reevaluated. This reevaluation needs to take into account our novel observations. Here, we  
16 report for the first time divergent behavior-encoding properties between dSPNs and iSPNs,  
17 which may reflect their functional dissimilarity. In particular, our observation that the same  
18 dSPNs are more consistently activated for each behavior, whereas iSPNs activation is more  
19 inconsistent, reveals that behavior specificity is milder in iSPNs than in dSPNs. This  
20 consideration is compatible with the general framework of the “complete selection-  
21 suppression” model. Additionally, one aspect of our recordings that should be considered is  
22 the high variability in neuronal activation in both dSPNs and iSPNs for different episodes of  
23 the same behavior. This feature has not been integrated into current models and likely  
24 reflects the large effect of external and internal contexts for all occurrences of a given motor  
25 program. We thus propose a novel formulation we call “adaptive selection-suppression”  
26 (Extended Data Fig. 10c), which attempts to reconcile the abovementioned models, previously  
27 reported observations, and our observations (Extended Data Fig. 10d). We hypothesize that  
28 dSPNs encode a small subset of accessible behaviors in the overall behavioral repertoire,  
29 including the observed behavior, and are highly dependent on the ongoing context and  
30 activated to promote these behaviors. Furthermore, specific iSPNs that encode competing  
31 behaviors, which are also highly dependent on the context, are activated to suppress these  
32 competing behaviors. In the subsequent basal ganglia nuclei, the comparison between  
33 selecting dSPN activations and suppressing iSPN activations dictates the ongoing motor  
34 program. This model supports our observation that similar behaviors correspond to  
35 comparable neuronal activations in dSPNs and iSPNs, as adjacent, highly similar behaviors are  
36 more likely to compete with each other than considerably different behaviors. Moreover, an  
37 important feature of the neural code in this model is that specific subgroups of dSPNs are  
38 activated in response to the expressed motor program, whereas specific subgroups of iSPNs  
39 are consistently inactive. This finding is substantiated by our observation that the most  
40 relevant information for predicting behaviors is located in dSPNs that are activated during  
41 behaviors and iSPNs that remain silent during behaviors. This model guarantees the  
42 coactivation of discrete subsets of dSPNs and iSPNs during each behavior and supports the  
43 broad prokinetic and antikinetic functions of the direct and indirect striatal pathways,  
44 respectively.

1 As described above, for each observed motor program, our model incorporates the notion of  
2 interepisode variability, which depends on the context dictated by both internal and external  
3 factors. Indeed, the dorsal striatum incorporates different representations of various  
4 contextual modalities, such as spatial information<sup>30,31</sup>, visual and tactile cues<sup>32</sup>, timing<sup>33</sup>,  
5 rewarding and aversive drives<sup>34</sup>, task constraints<sup>15</sup>, and sleep drive<sup>24</sup>. These studies  
6 substantiate the idea of rich, highly context-dependent behavior representations supported  
7 by SPNs. These representations likely originate in cortical areas<sup>35,36</sup> and are transferred to the  
8 dorsal striatum for subsequent processing and integration<sup>37-39</sup>. Our model proposes that  
9 dSPNs are activated not only in response to the expressed behavior but also in response to  
10 additional, often similar behaviors. The concurrent activation of specific iSPN ensembles  
11 enables the proper filtering of only one action, most likely the most appropriate action in a  
12 given context. This mode of organization likely supports efficient shifts in the behavioral  
13 strategy depending on an animal's internal state or task contingencies<sup>40</sup>.

14  
15 In addition, in our study, we did not observe a bias toward silencing among iSPNs during  
16 static behaviors. This could be because these behaviors contain supplemental substates that  
17 we could not separate with our analysis pipeline. Alternatively, this could be a consequence of  
18 different modes of encoding in iSPNs during ambulatory and static behaviors, similar to  
19 spatial mapping in the dorsal hippocampus, which is prominent mainly during  
20 locomotion<sup>27,28</sup>. This alternation between encoding modes may rely on functional interactions  
21 between the dorsal hippocampus and the dorsal striatum<sup>41,42</sup>.

22  
23 Furthermore, we demonstrated the long-term stability of the neural code in SPNs. We  
24 observed that behavior-related information was retained for weeks in behavior-active dSPNs  
25 and behavior-silent iSPNs, reinforcing our findings. More precisely, behavior-coding  
26 ensembles display a fluctuating membership that ultimately preserves behavior-related  
27 information. This finding supports the idea of stable behavioral representations in the dorsal  
28 striatum that exhibit some day-to-day fluctuations at the single-cell level. This coding  
29 turnover could preserve a certain level of flexibility within the system, which may enable the  
30 formation of new traces for encoding similar motor programs that occur in different  
31 environments or varied contexts. This mechanism could be critically engaged during  
32 procedural or episodic memory formation<sup>43</sup>.

33  
34 In summary, we identified clear functional differences between SPNs in the direct and indirect  
35 pathways in the dorsal striatum in response to self-paced spontaneous behaviors. Our data  
36 indicate that ongoing behaviors can be decoded based on dSPN and iSPN activity patterns,  
37 despite the fact that these patterns resemble those associated with similar behaviors.  
38 Behavior-specific firing and silencing are more prominent in dSPNs and iSPNs, respectively.  
39 Our observations are consistent with a model in which dSPN activations represent the  
40 ongoing behavior alongside competing motor programs, while iSPNs specific for the ongoing  
41 behavior become silent and iSPNs specific for competing behaviors become active. These  
42 observations are critical for a deeper understanding of striatal functional organization and  
43 strengthen the view that direct and indirect pathways cooperatively orchestrate motor  
44 programs in a manner that is highly dependent on the ongoing context by selecting a small  
45 subset of accessible behaviors while suppressing competing behaviors.

1  
2  
3  
4  
5  
6  
7  
8  
9  
10  
11  
12  
13  
14  
15  
16  
17  
18  
19  
20  
21  
22  
23  
24  
25  
26  
27  
28  
29  
30  
31  
32  
33  
34  
35  
36  
37  
38  
39  
40  
41  
42  
43  
44  
45

## REFERENCES:

1. Gunaydin, L.A. & Kreitzer, A.C. Cortico-Basal Ganglia Circuit Function in Psychiatric Disease. *Annu Rev Physiol* **78**, 327-350 (2016).
2. Alexander, G.E. & Crutcher, M.D. Functional architecture of basal ganglia circuits: neural substrates of parallel processing. *Trends Neurosci* **13**, 266-271 (1990).
3. Gerfen, C.R., *et al.* D1 and D2 dopamine receptor-regulated gene expression of striatonigral and striatopallidal neurons. *Science* **250**, 1429-1432 (1990).
4. Durieux, P.F., Schiffmann, S.N. & de Kerchove d'Exaerde, A. Differential regulation of motor control and response to dopaminergic drugs by D1R and D2R neurons in distinct dorsal striatum subregions. *EMBO J* **31**, 640-653 (2012).
5. Kravitz, A.V., *et al.* Regulation of parkinsonian motor behaviours by optogenetic control of basal ganglia circuitry. *Nature* **466**, 622-626 (2010).
6. Yttri, E.A. & Dudman, J.T. Opponent and bidirectional control of movement velocity in the basal ganglia. *Nature* **533**, 402-406 (2016).
7. Durieux, P.F., *et al.* D2R striatopallidal neurons inhibit both locomotor and drug reward processes. *Nat Neurosci* **12**, 393-395 (2009).
8. Ena, S., de Kerchove d'Exaerde, A. & Schiffmann, S.N. Unraveling the differential functions and regulation of striatal neuron sub-populations in motor control, reward, and motivational processes. *Front Behav Neurosci* **5**, 47 (2011).
9. Bateup, H.S., *et al.* Distinct subclasses of medium spiny neurons differentially regulate striatal motor behaviors. *Proc Natl Acad Sci U S A* **107**, 14845-14850 (2010).
10. Carvalho Poyraz, F., *et al.* Decreasing Striatopallidal Pathway Function Enhances Motivation by Energizing the Initiation of Goal-Directed Action. *J Neurosci* **36**, 5988-6001 (2016).
11. Barbera, G., *et al.* Spatially Compact Neural Clusters in the Dorsal Striatum Encode Locomotion Relevant Information. *Neuron* **92**, 202-213 (2016).
12. Cui, G., *et al.* Concurrent activation of striatal direct and indirect pathways during action initiation. *Nature* **494**, 238-242 (2013).
13. Parker, J.G., *et al.* Diametric neural ensemble dynamics in parkinsonian and dyskinetic states. *Nature* **557**, 177-182 (2018).
14. Klaus, A., *et al.* The Spatiotemporal Organization of the Striatum Encodes Action Space. *Neuron* **95**, 1171-1180 e1177 (2017).
15. Weglage, M., *et al.* Complete representation of action space and value in all dorsal striatal pathways. *Cell Rep* **36**, 109437 (2021).
16. Markowitz, J.E., *et al.* The Striatum Organizes 3D Behavior via Moment-to-Moment Action Selection. *Cell* **174**, 44-58 e17 (2018).
17. Mink, J.W. The basal ganglia: focused selection and inhibition of competing motor programs. *Prog Neurobiol* **50**, 381-425 (1996).
18. Giovannucci, A., *et al.* CalmAn an open source tool for scalable calcium imaging data analysis. *Elife* **8** (2019).
19. Zhou, P., *et al.* Efficient and accurate extraction of in vivo calcium signals from microendoscopic video data. *Elife* **7** (2018).

- 1 20. Deneux, T., *et al.* Accurate spike estimation from noisy calcium signals for ultrafast  
2 three-dimensional imaging of large neuronal populations in vivo. *Nat Commun* **7**, 12190  
3 (2016).
- 4 21. Clark, P.J., *et al.* Running Reduces Uncontrollable Stress-Evoked Serotonin and  
5 Potentiates Stress-Evoked Dopamine Concentrations in the Rat Dorsal Striatum. *PLoS One* **10**,  
6 e0141898 (2015).
- 7 22. Murty, V.P., Ballard, I.C., Macduffie, K.E., Krebs, R.M. & Adcock, R.A. Hippocampal  
8 networks habituate as novelty accumulates. *Learn Mem* **20**, 229-235 (2013).
- 9 23. Morrens, J., Aydin, C., Janse van Rensburg, A., Esquivelzeta Rabell, J. & Haesler, S. Cue-  
10 Evoked Dopamine Promotes Conditioned Responding during Learning. *Neuron* **106**, 142-153  
11 e147 (2020).
- 12 24. Yuan, X.S., *et al.* Striatal adenosine A2A receptor neurons control active-period sleep  
13 via parvalbumin neurons in external globus pallidus. *Elife* **6** (2017).
- 14 25. Stefanini, F., *et al.* A Distributed Neural Code in the Dentate Gyrus and in CA1. *Neuron*  
15 **107**, 703-716 e704 (2020).
- 16 26. Ziv, Y., *et al.* Long-term dynamics of CA1 hippocampal place codes. *Nat Neurosci* **16**,  
17 264-266 (2013).
- 18 27. McNaughton, B.L., Battaglia, F.P., Jensen, O., Moser, E.I. & Moser, M.B. Path integration  
19 and the neural basis of the 'cognitive map'. *Nat Rev Neurosci* **7**, 663-678 (2006).
- 20 28. Foster, T.C., Castro, C.A. & McNaughton, B.L. Spatial selectivity of rat hippocampal  
21 neurons: dependence on preparedness for movement. *Science* **244**, 1580-1582 (1989).
- 22 29. Sheintuch, L., *et al.* Tracking the Same Neurons across Multiple Days in Ca(2+) Imaging  
23 Data. *Cell Rep* **21**, 1102-1115 (2017).
- 24 30. Hinman, J.R., Chapman, G.W. & Hasselmo, M.E. Neuronal representation of  
25 environmental boundaries in egocentric coordinates. *Nat Commun* **10**, 2772 (2019).
- 26 31. van der Meer, M.A., Johnson, A., Schmitzer-Torbert, N.C. & Redish, A.D. Triple  
27 dissociation of information processing in dorsal striatum, ventral striatum, and hippocampus  
28 on a learned spatial decision task. *Neuron* **67**, 25-32 (2010).
- 29 32. Reig, R. & Silberberg, G. Multisensory integration in the mouse striatum. *Neuron* **83**,  
30 1200-1212 (2014).
- 31 33. Akhlaghpour, H., *et al.* Dissociated sequential activity and stimulus encoding in the  
32 dorsomedial striatum during spatial working memory. *Elife* **5** (2016).
- 33 34. Hikida, T., Kimura, K., Wada, N., Funabiki, K. & Nakanishi, S. Distinct roles of synaptic  
34 transmission in direct and indirect striatal pathways to reward and aversive behavior. *Neuron*  
35 **66**, 896-907 (2010).
- 36 35. Musall, S., Kaufman, M.T., Juavinett, A.L., Gluf, S. & Churchland, A.K. Single-trial neural  
37 dynamics are dominated by richly varied movements. *Nat Neurosci* **22**, 1677-1686 (2019).
- 38 36. Stringer, C., *et al.* Spontaneous behaviors drive multidimensional, brainwide activity.  
39 *Science* **364**, 255 (2019).
- 40 37. Charpier, S., Pidoux, M. & Mahon, S. Converging sensory and motor cortical inputs onto  
41 the same striatal neurons: An in vivo intracellular investigation. *PLoS One* **15**, e0228260  
42 (2020).
- 43 38. Peters, A.J., Fabre, J.M.J., Steinmetz, N.A., Harris, K.D. & Carandini, M. Striatal activity  
44 topographically reflects cortical activity. *Nature* **591**, 420-425 (2021).

- 1 39. Kress, G.J., *et al.* Convergent cortical innervation of striatal projection neurons. *Nat*  
2 *Neurosci* **16**, 665-667 (2013).
- 3 40. Bolkan, S.S., *et al.* Opponent control of behavior by dorsomedial striatal pathways  
4 depends on task demands and internal state. *Nat Neurosci* **25**, 345-357 (2022).
- 5 41. Gengler, S., Mallot, H.A. & Holscher, C. Inactivation of the rat dorsal striatum impairs  
6 performance in spatial tasks and alters hippocampal theta in the freely moving rat. *Behav*  
7 *Brain Res* **164**, 73-82 (2005).
- 8 42. Goodroe, S.C., Starnes, J. & Brown, T.I. The Complex Nature of Hippocampal-Striatal  
9 Interactions in Spatial Navigation. *Front Hum Neurosci* **12**, 250 (2018).
- 10 43. Mau, W., Hasselmo, M.E. & Cai, D.J. The brain in motion: How ensemble fluidity drives  
11 memory-updating and flexibility. *Elife* **9** (2020).
- 12 44. Gong, S., *et al.* Targeting Cre recombinase to specific neuron populations with bacterial  
13 artificial chromosome constructs. *J Neurosci* **27**, 9817-9823 (2007).
- 14 45. Daigle, T.L., *et al.* A Suite of Transgenic Driver and Reporter Mouse Lines with  
15 Enhanced Brain-Cell-Type Targeting and Functionality. *Cell* **174**, 465-480 e422 (2018).
- 16 46. Mathis, A., *et al.* DeepLabCut: markerless pose estimation of user-defined body parts  
17 with deep learning. *Nat Neurosci* **21**, 1281-1289 (2018).
- 18 47. Pedregosa, F., *et al.* Scikit-learn: Machine learning in Python. *J Mach Learn Res* **12**,  
19 2825-2830 (2011).
- 20

1 **ACKNOWLEDGMENTS:**

2

3 We thank Dr. Philippe Faure and Dr. Clément Léna for their critical reading and their helpful  
4 insights on our manuscript. C.V. is a postdoctoral researcher of FRS-FNRS. A.C. is a research  
5 fellow of FRS-FNRS. P.B. is a research associate of the FRS-FNRS. A.K.E. is a research director  
6 of the FRS-FNRS and a WELBIO investigator. This research was supported by grants from  
7 FRS-FNRS (grants #23587797, #33659288, #33659296), WELBIO (#30256053), Fondation  
8 Simone et Pierre Clerdent (2018 Prize), and Fondation ULB to A.K.E., and grants from FRS-  
9 FNRS (grants #34793348, #35285205) to P.B. The funders had no role in study design, data  
10 collection and analysis, preparation of the manuscript, or decision to publish.

11

12

13 **AUTHOR CONTRIBUTIONS:**

14

15 C.V., P.B., and A.K.E. designed the study. A.C. and D.H. deployed in vivo calcium imaging  
16 protocols and performed experiments. C.V., A.C. and A.K.E. conceptualized the analyses. C.V.  
17 and A.C. established and conducted calcium signal extraction and behaviors identification. C.V.  
18 performed the other analyses. A.K.E. supervised the project. C.V., A.C., and A.K.E. wrote the  
19 manuscript. All authors discussed the manuscript.

20

21

22 **COMPETING INTERESTS:**

23

24 The authors declare no competing interests.

25

26

27 **DATA AVAILABILITY:**

28

29 The data supporting the findings are available within the article and its supplementary  
30 materials.

31

1 **FIGURES:**

2

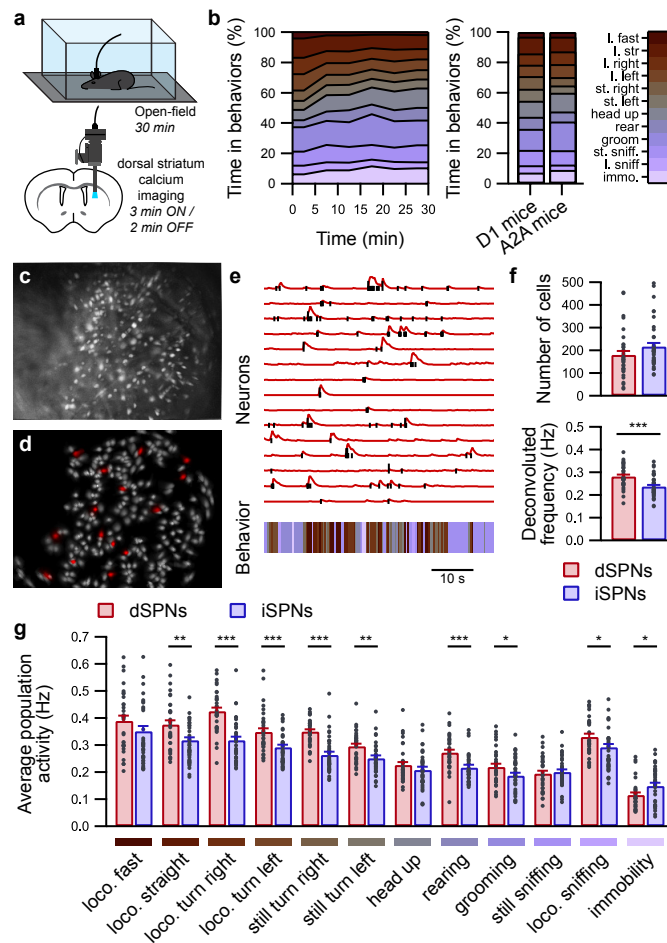

3

4

5 **Fig. 1: Simultaneous calcium imaging and behavioral identification in freely behaving**  
6 **mice.**

7 **a**, Mice expressing GCaMP6s in either dSPNs or iSPNs and equipped with a microendoscope  
8 freely exploring a well-known open field.

9 **b**, Temporal evolution of identified behaviors during 30 min of open-field exploration for all  
10 recording sessions (left panel; 5 min long bins; n = 73 sessions in 17 mice) and average  
11 distribution of behaviors over 30 min (right panel) in mice expressing GCaMP6s in dSPNs (D1  
12 mice; n = 33 sessions with 8 mice) or iSPNs (A2A mice; n = 40 sessions in 9 mice).  
13 Abbreviations: l., locomotion; st., still; immo., immobility.

14 **c-d**, Representative image from one A2A mouse of the maximum fluorescence intensity  
15 projection of iSPNs labeled with GCaMP6s (c) and the corresponding isolated spatial  
16 components identified using CNMF-E (d).

17 **e**, Representative fluorescence traces (top panel, red lines) and deconvolved calcium activity  
18 (top panel, black lines) from selected SPNs (red in d) aligned with detected behaviors (bottom  
19 panel).

20 **f**, Quantification for each recording session of the identified neuron number (top panel) and  
21 deconvolved calcium activity (bottom panel) for dSPNs (red; n = 33 sessions in 8 mice) and  
22 iSPNs (blue; n = 40 sessions in 9 mice) (dSPNs vs. iSPNs: \*\*\* p < 0.001).

- 1 **g**, Average population activity is significantly higher in dSPNs than in iSPNs during many
- 2 behaviors and significantly lower during immobility (dSPNs vs. iSPNs: \*  $p < 0.05$ , \*\*  $p < 0.01$ ,
- 3 \*\*\*  $p < 0.001$ ). Abbreviation: loco., locomotion.



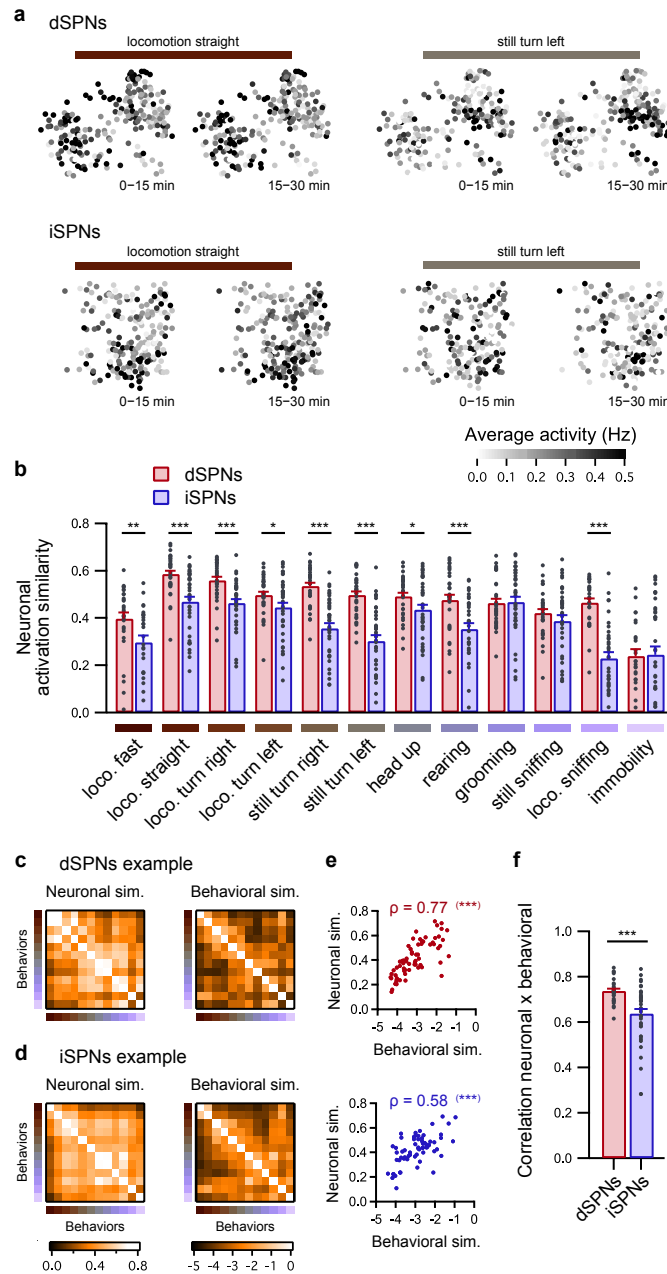

1  
2

**Fig. 2: Dynamical properties of behavior encoding differ between dSPNs and iSPNs.**

**a**, Representative neuronal activation maps of dSPNs (top panels) and iSPNs (bottom panels) from one session, illustrating the averaged activation of neurons in the first half (0-15 min) and second half (15-30 min) of the recording session for two behaviors (locomotion straight, left; still turn left, right). Note that the neuronal activation appears highly similar during the first and second halves of the recording in dSPNs during the two behaviors and less similar in iSPNs during the same behavior.

**b**, Neuronal activation similarity between the first and second halves of the open-field exploration was higher in dSPNs (red; n = 33 sessions in 8 mice) than in iSPNs (blue; n = 40 sessions in 9 mice) for all behaviors except grooming, still sniffing, and immobility (dSPNs vs. iSPNs: \* p < 0.05, \*\* p < 0.01, \*\*\* p < 0.001).

**c-d**, Examples of matrices of pairwise neuronal activation similarity between behaviors (left panels) and matrices of pairwise behavioral similarity between behaviors (right panels) in

15

1 one session from one representative dSPNs recording **(c)** and one representative iSPNs  
2 recording **(d)**.  
3 **e**, For pairs of behaviors, the neuronal activation similarity and behavioral similarity are  
4 significantly correlated in both dSPNs and iSPNs, as illustrated by the examples displayed in c-  
5 d (Spearman correlation: \*\*\*  $p < 0.001$ ).  
6 **f**, Average correlation coefficient (Spearman correlation) between pairwise behavioral and  
7 neuronal similarities is higher for dSPNs (red;  $n = 33$  sessions in 8 mice) than iSPNs (blue;  $n =$   
8 40 sessions in 9 mice) (dSPNs vs. iSPNs: \*\*\*  $p < 0.001$ ).

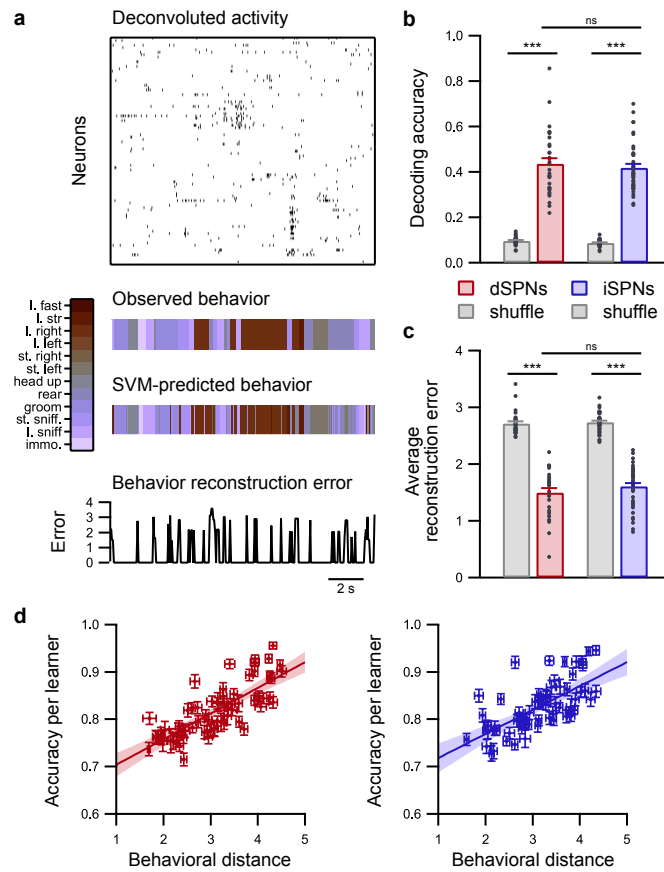

1  
2  
3  
4  
5  
6  
7  
8  
9  
10  
11  
12  
13  
14  
15  
16  
17  
18  
19  
20

**Fig. 3: Predicting behaviors is equally efficient when using either dSPN or iSPN ensembles.**

**a**, Example of behavior decoding using support vector machines (SVM). Using deconvoluted calcium signal (top panel), support vectors are trained to predict ongoing behaviors (middle panel). The prediction error (bottom panel) is calculated by using the behavioral distance between the observed and predicted behaviors.

**b**, Behavior decoding accuracy was similar when dSPNs (red;  $n = 31$  sessions in 8 mice) or iSPNs (red;  $n = 38$  sessions in 9 mice) were used (dSPNs vs. iSPNs: ns  $p > 0.05$ ). Gray, chance level when decoding from time-lagged data (dSPNs or iSPNs vs. shuffle: \*\*\*  $p < 0.01$ ).

**c**, Decoding error evaluated as the average behavioral error for the entire time series using dSPNs (red;  $n = 31$  sessions in 8 mice) or iSPNs (red;  $n = 38$  sessions in 9 mice) (dSPNs vs. iSPNs: ns  $p > 0.05$ ). Gray, chance level when decoding from time-lagged data (dSPNs or iSPNs vs. shuffle: \*\*\*  $p < 0.01$ ).

**d**, Relationship between the behavioral distance and decoding accuracy for each individual SVM binary classifier using dSPNs (left panel) or iSPNs (right panel). The data for each classifier are presented as the mean (dots)  $\pm$  SEM across sessions for both the behavioral distance and accuracy. Colored straight lines represent the average regression line, and shaded areas illustrate the 95% confidence interval.

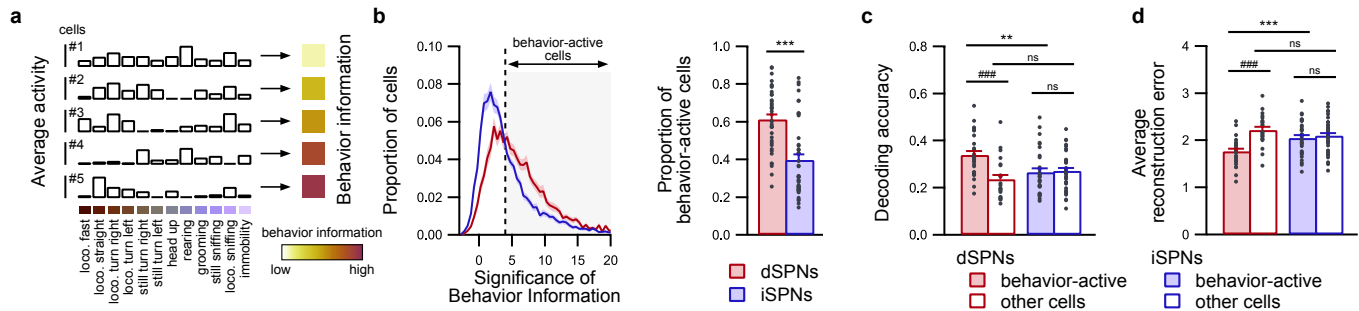

1  
2

**Fig. 4: Relevant information for decoding behaviors lies primarily in excited dSPNs.**

**a**, Information content of neuronal activity in response to behaviors was derived based on the behavior information, which was calculated as the mutual information between the behavior time series and neuronal activity. As illustrated for 5 representative neurons, a higher level of behavior information reflects a stronger degree of tuning of neuronal activation toward behaviors.

**b**, Cells are identified as behavior-active when the level of significance of behavior information exceeds 4 sigma of the shuffled distribution (gray area; left panel; threshold indicated by the black dashed vertical line). A larger proportion of behavior-active cells was identified among dSPNs (n = 29 sessions in 8 mice) than iSPNs (n = 37 sessions in 9 mice) (right panel; dSPNs vs. iSPNs: \*\*\* p < 0.001).

**c-d**, Decoding accuracy (**c**) and average decoding error (**d**) when predicting behaviors using behavior-active neurons (plain bars) and non-behavior-active cells (unfilled bars). The decoding performance is better for behavior-active cells than for non-behavior-active cells in dSPNs recordings (red bars; n = 29 sessions in 8 mice), whereas it is similar in iSPNs recordings (blue bars; n = 37 sessions in 9 mice) ensembles. Moreover, the decoding performance is better for behavior-active dSPNs than for behavior-active iSPNs (dSPNs vs. iSPNs: ns p > 0.05, \*\* p < 0.01; behavior-active vs. other cells: ns p > 0.05, ### p < 0.001).

20

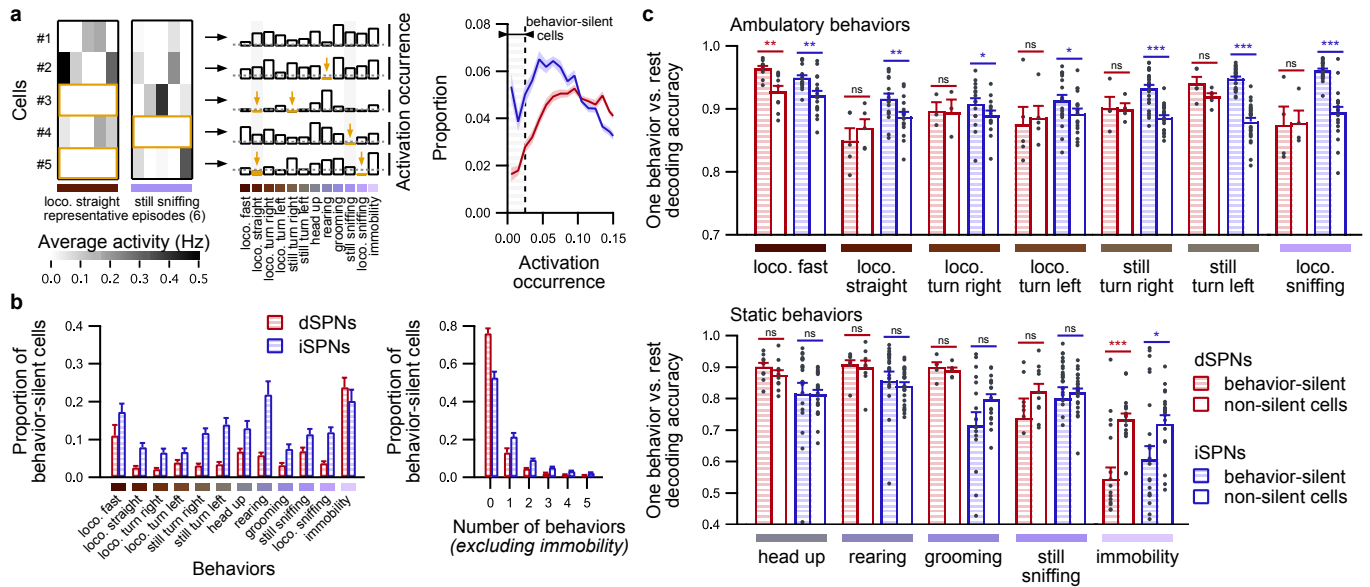

1

2

3 **Fig. 5: Relevant information for decoding behaviors lies primarily in silent iSPNs.**

4 **a**, Behavior-silent cells are identified according to how often these cells are active during  
 5 episodes of a given behavior, as illustrated by 5 representative neurons (left panel; 6  
 6 representative episodes displayed) that displayed various levels of activation occurrence for  
 7 each behavior (middle panel). Some neurons are rarely or never active during all episodes of a  
 8 given behavior (middle panel, yellow bars and arrows). The activation occurrence threshold  
 9 was set to 0.025 according to the distribution of activation occurrence values for all behaviors  
 10 in dSPNs and iSPNs (right panel; threshold indicated by the black dashed vertical line).

11 **b**, Average fraction of dSPNs and iSPNs identified as behavior-silent for each behavior (left  
 12 panel) and average fraction of dSPNs and iSPNs categorized as behavior-silent during no  
 13 behavior or one to five behaviors (right panel).

14 **c**, One behavior vs. rest decoding accuracy (simple matching coefficient) for prediction in  
 15 separating each behavior from other behaviors using neurons that were classified as  
 16 behavior-silent during this behavior (hatched bars) or nonsilent (unfilled bars) in dSPNs (red;  
 17 n = 29 sessions in 8 mice) or iSPNs recordings (blue; n = 37 sessions in 9 mice) (behavior-  
 18 silent vs. nonsilent neurons: ns,  $p > 0.05$ , \*  $p < 0.05$ , \*\*  $p < 0.01$ , \*\*\*  $p < 0.001$ ). Note that the  
 19 decoding performance is higher for behavior-silent iSPNs than for nonsilent cells during  
 20 ambulatory behaviors (top panel), whereas this result is not observed during static behaviors  
 21 (bottom panels).

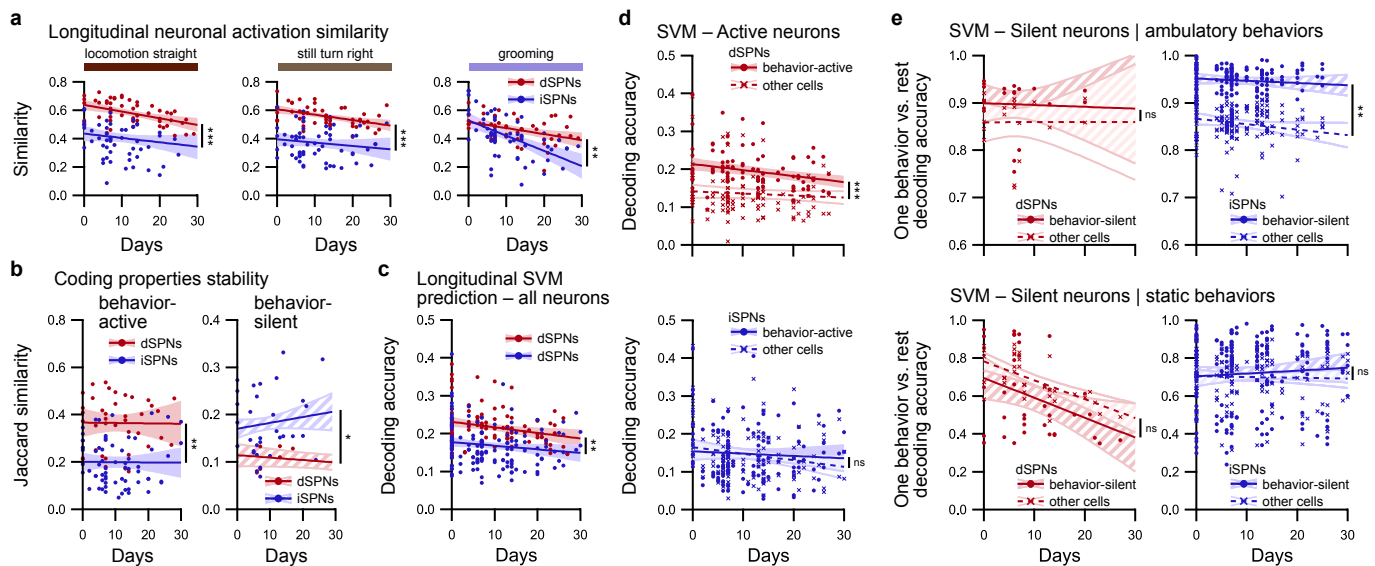

1  
2

3 **Fig. 6: Long-term stability of the respective coding properties of dSPNs and iSPNs.**

4 **a**, Differences in neuronal activation similarity during identified behaviors between dSPNs  
5 (red; n = 52 pairs of sessions in 8 mice) and iSPNs (blue; n = 62 pairs of sessions in 9 mice) are  
6 preserved for weeks, as illustrated for locomotion straight (left), still turn right (middle), and  
7 grooming (right) (dSPNs vs. iSPNs: \*\*\* p < 0.001).

8 **b**, Quantification of the long-term stability of coding properties of neurons using the Jaccard  
9 similarity coefficient between binary classification of longitudinally registered neurons that  
10 were labeled as behavior-active (left panel) or behavior-silent during ambulatory behaviors  
11 (right panel) in dSPN (red; behavior-active: n = 58 pairs of sessions meeting criterion;  
12 behavior-silent: n = 16 pairs of sessions meeting criterion) and iSPN recordings (blue;  
13 behavior-active: n = 70 pairs of sessions meeting criterion; behavior-silent: n = 34 pairs of  
14 sessions meeting criterion) (dSPNs vs. iSPNs: \* p < 0.05, \*\* p < 0.01). Note that the similarity is  
15 higher for behavior-active dSPNs and behavior-silent iSPNs.

16 **c**, Accuracy in predicting the behavior according to the activity of longitudinally registered  
17 neurons using SVM classifiers trained on different recording sessions for dSPNs (red; n = 121  
18 pairs of sessions) and iSPNs (blue; n = 171 pairs of sessions) (dSPNs vs. iSPNs: \*\* p < 0.01).

19 **d**, Decoding accuracy for longitudinal predictions of behaviors using behavior-active neurons  
20 (circles, plain line, colored confidence interval) or non-behavior-active cells (crosses, dashed  
21 line, unfilled confidence interval) in dSPN (top panel; red; n = 93 pairs of sessions meeting  
22 criterion) or iSPN recordings (bottom panel; blue; n = 132 pairs of sessions meeting  
23 criterion). The accuracy remained higher for behavior-active dSPNs than non-behavior-active  
24 dSPNs for many days, whereas the accuracy was similar for both groups of iSPNs (behavior-  
25 active vs. other cells: ns p > 0.05, \*\*\* p < 0.001).

26 **e**, Simple matching coefficient for long-term predictions on separating one behavior from  
27 other behaviors using neurons classified as behavior-silent (circles, plain line, hatched  
28 confidence interval) or nonsilent (crosses, dashed line, unfilled confidence interval) during  
29 this behavior and pooled for ambulatory behaviors (top panels) and static behaviors (bottom  
30 panels) for dSPNs (left panels; red; ambulatory: n = 18 pairs of sessions meeting criterion;  
31 static: n = 46 pairs of sessions meeting criterion) and iSPNs (right panels; blue; ambulatory: n  
32 = 52 pairs of sessions meeting criterion; static: n = 69 pairs of sessions meeting criterion).  
33 Note that the only difference between behavior-silent and non-behavior-silent cells is

- 1 observed for iSPNs during ambulatory behaviors (behavior-silent vs. other cells: ns  $p > 0.05$ ,
- 2 \*\*  $p < 0.01$ ).

1 **EXTENDED DATA FIGURES:**

2

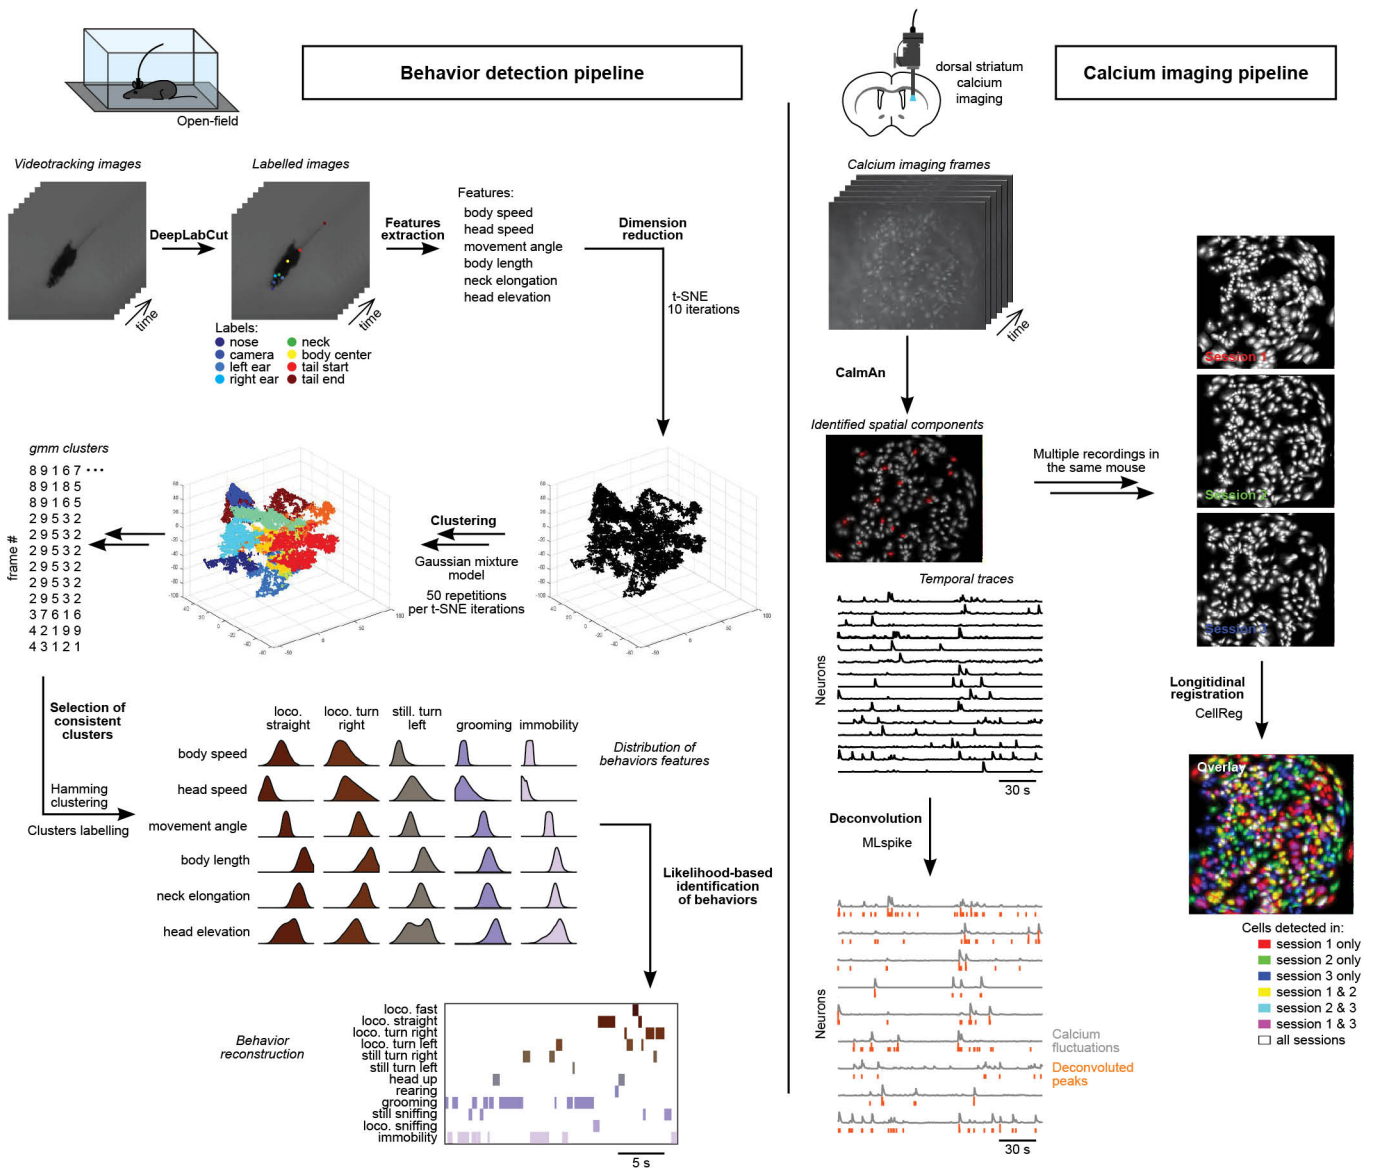

3

4

5 **Extended Data Fig. 1: General pipeline for behavioral and calcium data extraction.**

6 The synchronous video tracking and microendoscope recordings were analyzed as follows.  
 7 For video tracking recordings, images are first processed using DeepLabCut to identify and  
 8 track the position of 8 body parts (nose, camera, ear left, ear right, neck, body center, tail start,  
 9 and tail end). Using these points, 6 features describing the animal's posture are computed and  
 10 fed into multiple iterations of t-SNE dimension reduction and clustering using a Gaussian  
 11 mixture model. The resulting set of clusters is clustered (Hamming distance) to identify and  
 12 isolate consistent behavioral clusters and define their corresponding distributions in the  
 13 feature space. These distributions are used to label all video tracking frames using likelihood-  
 14 based estimators. In parallel, calcium imaging videos are first processed using CalMan to  
 15 separate and identify neurons and extract the temporal evolution of the calcium signal. This  
 16 signal is then deconvolved using the MLspike algorithm. The cells that are identified during  
 17 different recording sessions in the same mouse are aligned and longitudinally registered  
 18 using CellReg.



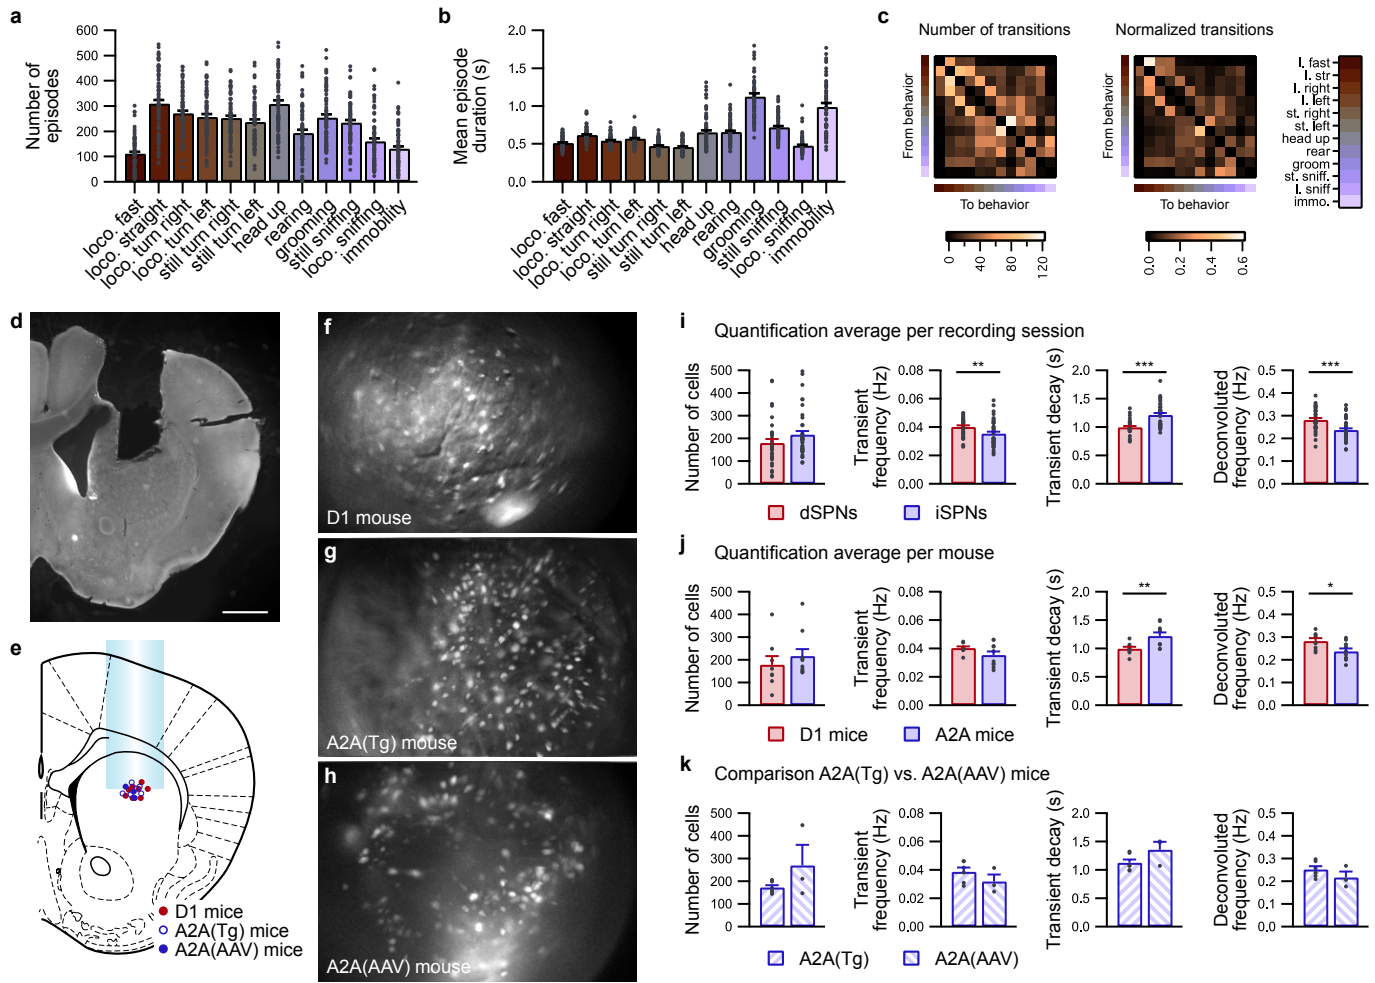

1  
2

### Extended Data Fig. 2: Mice behavior in the open-field and one-photon calcium imaging analyses.

**a-c**, Description of mouse behavior architecture during 30 min of undisturbed exploration in an open field (n = 73 sessions in 17 mice), evaluated according to the number of episodes of each behavior (**a**), the average duration of behavior episodes (**b**), and the sequential organization of behaviors, as illustrated by the averaged matrix of the number of transitions (**c**, left panel) from one behavior (lines) to a different behavior (columns), and the same normalized matrix (**c**, right panel), to evaluate the probability when stopping one behavior to begin any of the other 11 behaviors.

**d**, Photomicrograph of a coronal section from the brain of a mouse implanted with a GRIN lens in the striatum.

**e**, Reconstruction of the GRIN lens positions for all D1 mice (n = 8) and A2A mice (A2A(Tg), n = 6; A2A(AAV), n = 3).

**f-h**, Representative image of the maximum fluorescence intensity projection of SPNs labeled with GCaMP6s in a D1 mouse (**f**), A2A(Tg) mouse (**g**), and A2A(AAV) mouse (**h**).

**i**, Quantification for each recording session of the identified neuron number, calcium transient average frequency, average transient decay characteristic time, and deconvolved calcium activity for dSPNs (red; n = 33 sessions in 8 mice) and iSPNs (blue; n = 40 sessions in 9 mice) (dSPNs vs. iSPNs: \*\* p < 0.01; \*\*\* p < 0.001).

**j**, Same as **i**, averaged per mouse (D1 mice, n = 8; A2A mice, n = 9) (D1 vs. A2A: \* p < 0.05; \*\* p < 0.01).

23

1 **k**, Comparison of the above parameters, targeting GCaMP6s expression in iSPNs using  
2 transgenic reporter mice (A2A(Tg), n = 6) or AAV injection (A2A(AAV), n = 3). No significant  
3 difference was observed between A2A(Tg) mice and A2A(AAV) mice.

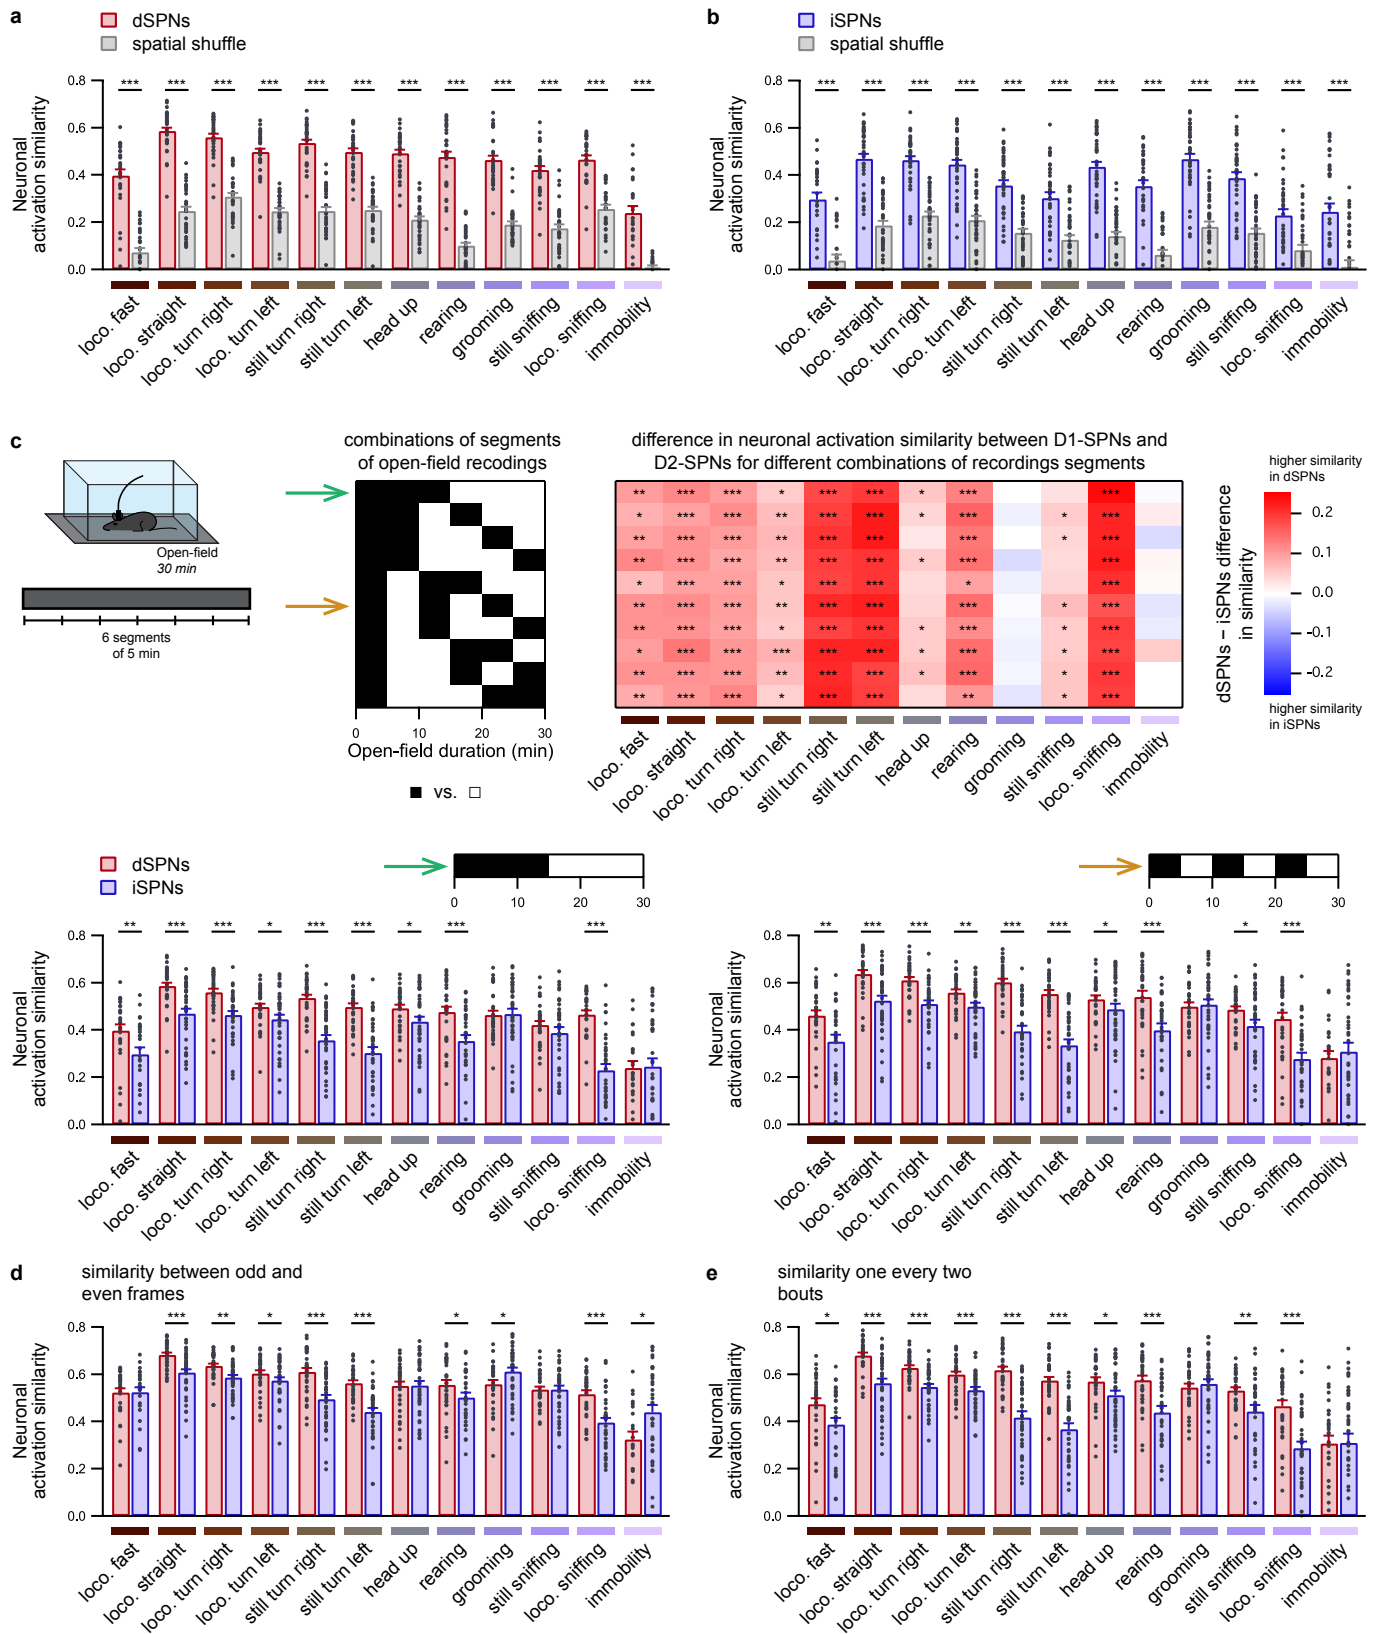

1  
2

### Extended Data Fig. 3: Time invariance of differences in neuronal activation similarity between dSPNs and iSPNs.

3  
4  
5 **a-b**, Neuronal activation similarity between the first and second halves of open-field  
6 exploration in dSPNs (**a**) (red; n = 33 sessions in 8 mice) and iSPNs (**b**) (blue; n = 40 sessions  
7 in 9 mice) compared with the spatial shuffle of neurons between the first and second halves of  
8 open-field exploration (gray bars) (dSPNs or iSPNs vs. shuffle: \*\*\* p < 0.001).

1 **c**, The 30 min open-field recording is split into 6 segments lasting 5 min each (top left panel),  
2 and the difference between the dSPN and iSPN neuronal activation similarities is calculated  
3 for all combinations of 5 min segments into two 15 min segments (3 segments per groups)  
4 (top middle and right), highlighting that the difference in similarity between dSPNs and iSPNs  
5 is a time-invariant property of the neuronal code. (Bottom) Detailed representation of  
6 neuronal activation similarity for two splitting schemes, indicated by colored arrows (dSPNs  
7 vs. iSPNs: \*  $p < 0.05$ , \*\*  $p < 0.01$ , \*\*\*  $p < 0.001$ ).

8 **d**, Neuronal activation similarity between dSPNs (red;  $n = 33$  sessions in 8 mice) and iSPNs  
9 (blue;  $n = 40$  sessions in 9 mice) for each behavior, as computed by comparing odd and even  
10 frames (dSPNs vs. iSPNs: \*  $p < 0.05$ , \*\*  $p < 0.01$ , \*\*\*  $p < 0.001$ ).

11 **e**, Neuronal activation similarity between dSPNs (red;  $n = 33$  sessions in 8 mice) and iSPNs  
12 (blue;  $n = 40$  sessions in 9 mice), as computed by comparing one episode out of two for each  
13 behavior to complementary episodes (dSPNs vs. iSPNs: \*  $p < 0.05$ , \*\*  $p < 0.01$ , \*\*\*  $p < 0.001$ ).

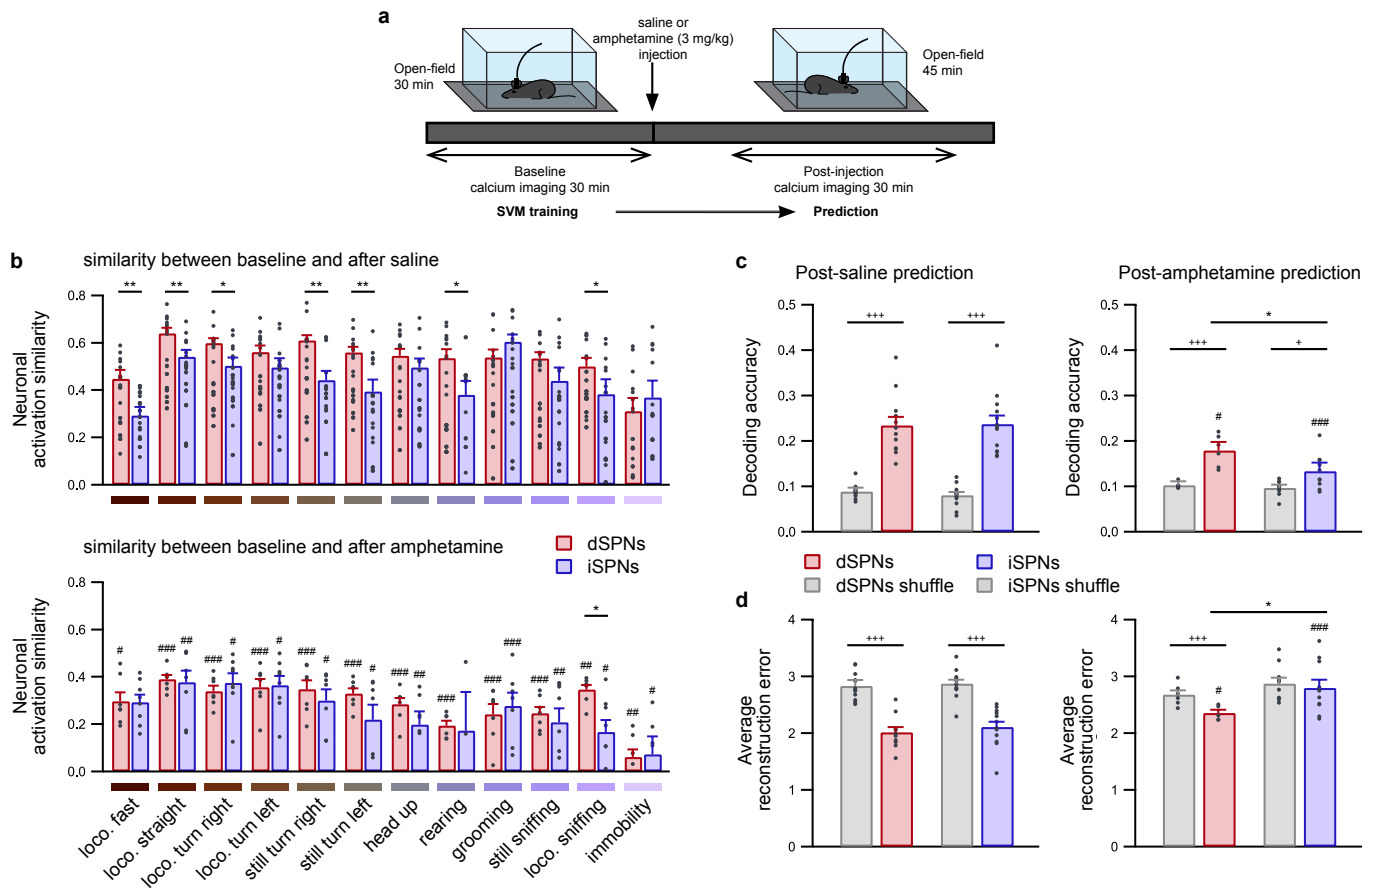

**Extended Data Fig. 4: Amphetamine administration reduces the neuronal activation similarity of dSPNs and iSPNs and disrupts SVM-based behavior predictions.**

**a**, Mice expressing GCaMP6s in either dSPNs or iSPNs freely explored a well-known open field for 30 min (baseline period), received an injection of either saline or amphetamine (3 mg/kg), and were placed back into the open field for an additional 45 min. The post-injection period began 10 min after the injection and lasted 30 min. The SVM classifiers were trained on the baseline period, and the predictions were performed based on the neuronal activity in the post-injection period.

**b**, Neuronal activation similarity between baseline and postinjection periods of open-field exploration in dSPNs (red) and iSPNs (blue) for all detected behaviors following saline (top; dSPNs: n = 12 sessions in 8 mice; iSPNs: n = 11 sessions in 9 mice) or amphetamine (3 mg/kg) injection (bottom; dSPNs: n = 7 sessions in 7 mice; iSPNs: n = 8 sessions in 8 mice) (dSPNs vs. iSPNs: \* p < 0.05, \*\* p < 0.01, \*\*\* p < 0.001; saline vs. amphetamine: # p < 0.05, ## p < 0.01, ### p < 0.001).

**c-d**, Accuracy of behavior prediction (**c**) and mean behavioral reconstruction error (**d**) using dSPNs (red) or iSPNs (blue) after saline (left panels; dSPNs: n = 10 sessions in 6 mice; iSPNs: n = 13 sessions in 9 mice) or amphetamine administration (right panels; dSPNs: n = 6 sessions in 6 mice; iSPNs: n = 9 sessions in 9 mice), as compared with time-lagged data (gray). (dSPNs vs. iSPNs: \* p < 0.05; saline vs. amphetamine: # p < 0.05, ## p < 0.01, ### p < 0.001; dSPNs or iSPNs vs. shuffle: + p < 0.05; +++ p < 0.001).

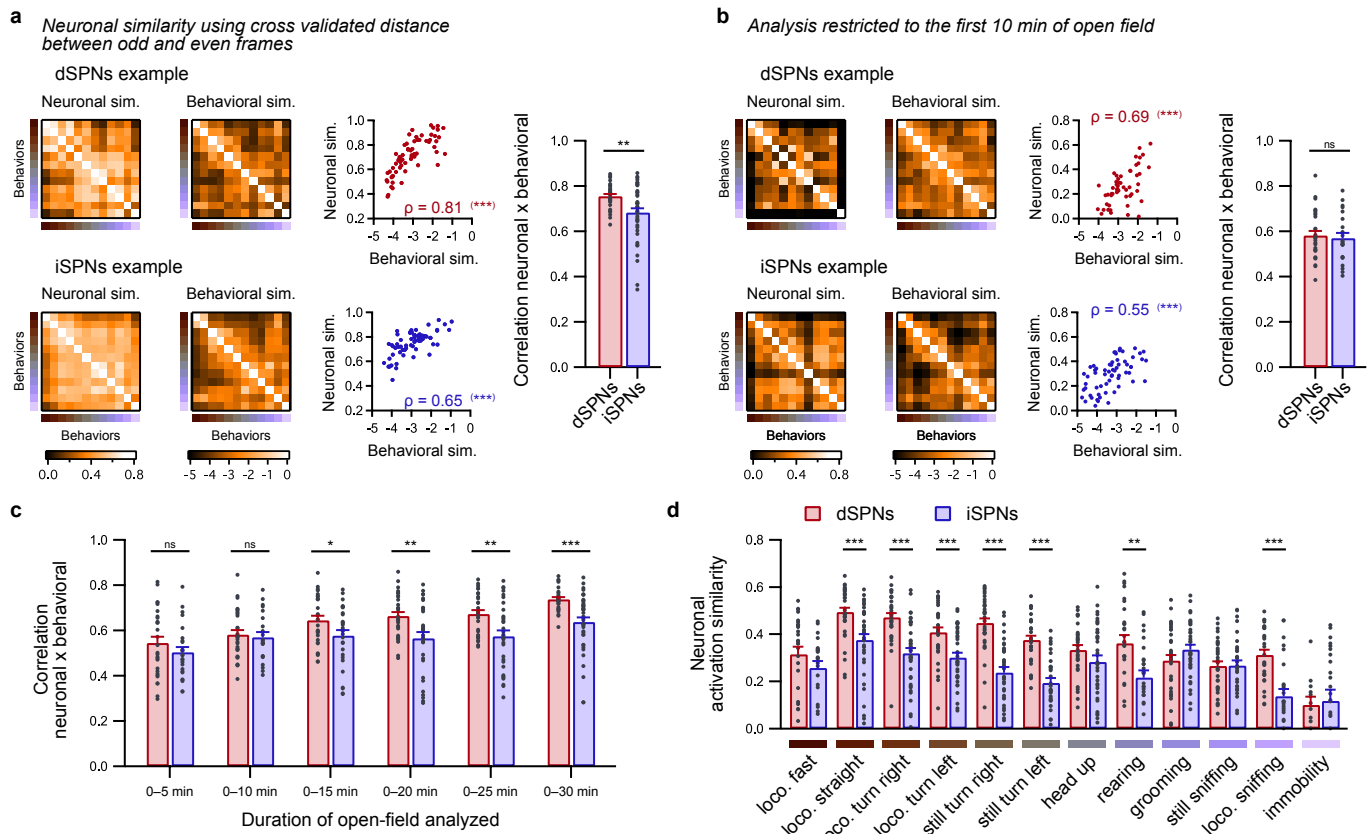

1  
2  
3  
4  
5  
6  
7  
8  
9  
10  
11  
12  
13  
14  
15  
16  
17  
18  
19  
20  
21  
22  
23  
24  
25  
26

**Extended Data Fig. 5: Complements related to correlations between pairwise neuronal similarity and behavioral similarity between behaviors.**

**a**, Examples of matrices of pairwise neuronal activation similarity between behaviors computed using the cross-validated Euclidean distance between odd and even frames, matrices of pairwise behavioral similarity between behaviors (left panels), and the corresponding scatterplot for pairs of behaviors (middle; Spearman correlation, \*\*\*  $p < 0.001$ ) for one session from one representative D1 mouse (top) and one representative D2 mouse (bottom). The average correlation coefficient (right) between the pairwise behavioral and neuronal similarities was higher for dSPNs (red;  $n = 33$  sessions in 8 mice) than for iSPNs (blue;  $n = 40$  sessions in 9 mice) (dSPNs vs. iSPNs: \*\*\*  $p < 0.001$ ). The results are similar to those displayed in Fig. 2c-f.

**b**, Same as **a**, with both the neuronal and behavioral similarities computed for only the first 10 min of open-field exploration. In this condition, the average correlation between the behavioral and neuronal similarities was similar for dSPNs (red;  $n = 24$  sessions in 8 mice) and iSPNs (blue;  $n = 21$  sessions in 9 mice) (dSPNs vs. iSPNs: ns  $p > 0.05$ ).

**c**, Comparison of correlation coefficients between behavioral and neuronal similarities evaluated for different durations of open-field exploration in increments of 5 min for dSPNs (red;  $n = 33$  sessions in 8 mice) and iSPNs (blue;  $n = 40$  sessions in 9 mice) (dSPNs vs. iSPNs: ns  $p > 0.05$ ; \*  $p < 0.05$ , \*\*  $p < 0.01$ , \*\*\*  $p < 0.001$ ).

**d**, Neuronal activation similarity between the first 5 min and subsequent 5 min of open-field exploration remained higher in dSPNs (red;  $n = 24$  sessions in 8 mice) than in iSPNs (red;  $n = 21$  sessions in 9 mice) during locomotion (loco.) straight, locomotion turn right and left, still turn right and left, rearing, and locomotion sniffing (dSPNs vs. iSPNs: \*  $p < 0.05$ , \*\*  $p < 0.01$ , \*\*\*  $p < 0.001$ ).

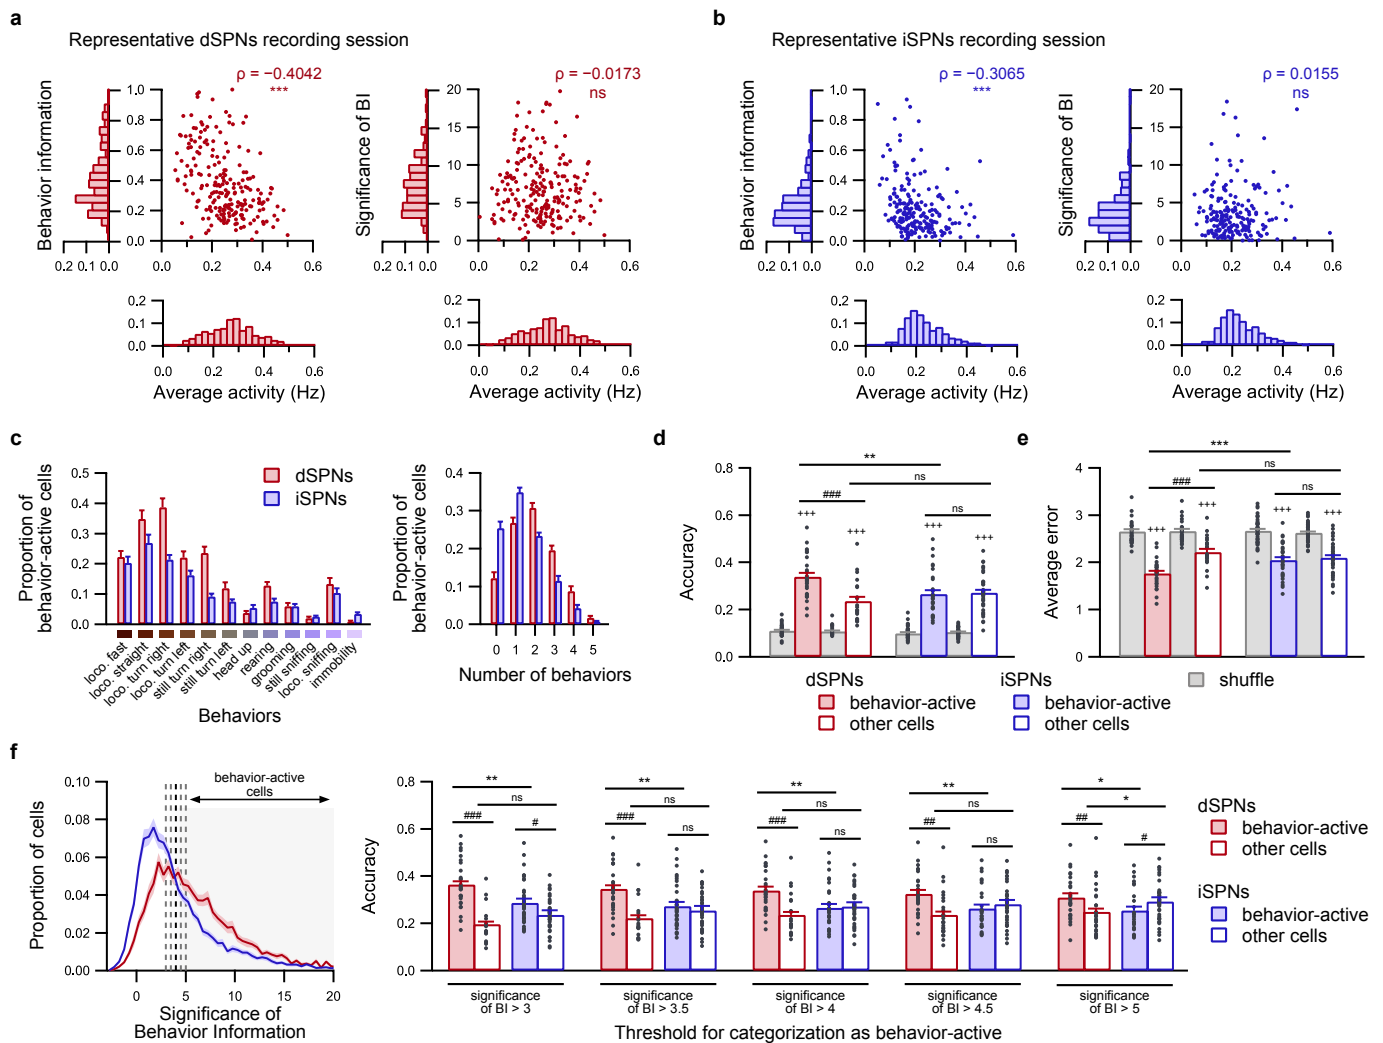

1  
2

### 3 Extended Data Fig. 6: Significance of mutual information and characterization of 4 behavior-active cells.

5 **a-b**, Scatterplots of the relationship between the behavior information (left) or significance of  
6 the behavior information (right) and the average activity of dSPNs (**a**) and iSPNs (**b**) in one  
7 representative session. Note the significant inverse correlation (Spearman correlation: ns  $p >$   
8  $0.05$ , \*\*\*  $p < 0.001$ ) between the behavior information and event rate, which indicates that the  
9 behavior information is biased toward neurons firing at a low rate. Using the significance of  
10 the behavior information, which is computed by comparing the observed value of the  
11 behavior information to random shuffles, removes this bias.

12 **c**, Average fraction of dSPNs and iSPNs identified as behavior-active (significance of behavior  
13 information above 4) for each behavior (left panel) and the average fraction of dSPNs and  
14 iSPNs labeled as behavior-active during no behavior or one to five behaviors (right panel)  
15 (dSPNs:  $n = 29$  sessions from 8 mice; iSPNs:  $n = 37$  sessions from 9 mice).

16 **d-e**, Decoding accuracy (**d**) and average reconstruction error (**e**) of SVM classifiers applied to  
17 behavior-active (plain bars) or non-behavior-active (unfilled bars) dSPNs (red;  $n = 29$   
18 sessions in 8 mice) or iSPNs (blue;  $n = 37$  sessions in 9 mice), compared with the chance level  
19 when decoding classifiers trained on time-lagged data (gray bars) (dSPNs vs. iSPNs: ns  $p >$   
20  $0.05$ , \*\*\*  $p < 0.01$ ; behavior-active vs. other cells: #  $p < 0.05$ , ###  $p < 0.001$  observed data vs.  
21 time-lagged: +++  $p < 0.001$ ). Note that the decoding performance based on either behavior-  
22 active neurons or other cells is better than that based on time-shuffled data, and the decoding

1 performance is better with behavior-active cells than with non-behavior-active cells in dSPN  
2 recordings (red bars; n = 29 sessions from 8 mice), whereas performance is similar between  
3 both cell groups in iSPNs recordings (blue bars; n = 37 sessions from 9 mice). Moreover, the  
4 decoding performance is better for behavior-active dSPNs than for behavior-active iSPNs.  
5 **f**, Effect of modifying the threshold used for the level of significance of behavior information  
6 for labelling neurons as behavior-active (left panel) on the decoding accuracy (right panel)  
7 when predicting behaviors using behavior-active neurons (plain bars) or non-behavior-active  
8 neurons (unfilled bars) in dSPN (red bars; n = 29 sessions from 8 mice) and iSPN (blue bars; n  
9 = 37 sessions from 9 mice) recordings (dSPNs vs. iSPNs: ns,  $p > 0.05$ , \*\*  $p < 0.01$ ; behavior-  
10 active vs. other cells: #  $p < 0.05$ , ###  $p < 0.001$ ). The use of 5 different thresholds (ranging from  
11 3 to 5 SD, corresponding to the position of the actual behavior information in comparison to  
12 the distribution of the behavior information calculated from random permutations) maintains  
13 significantly higher decoding performance when using behavior-active dSPNs than when  
14 using behavior-active iSPNs.



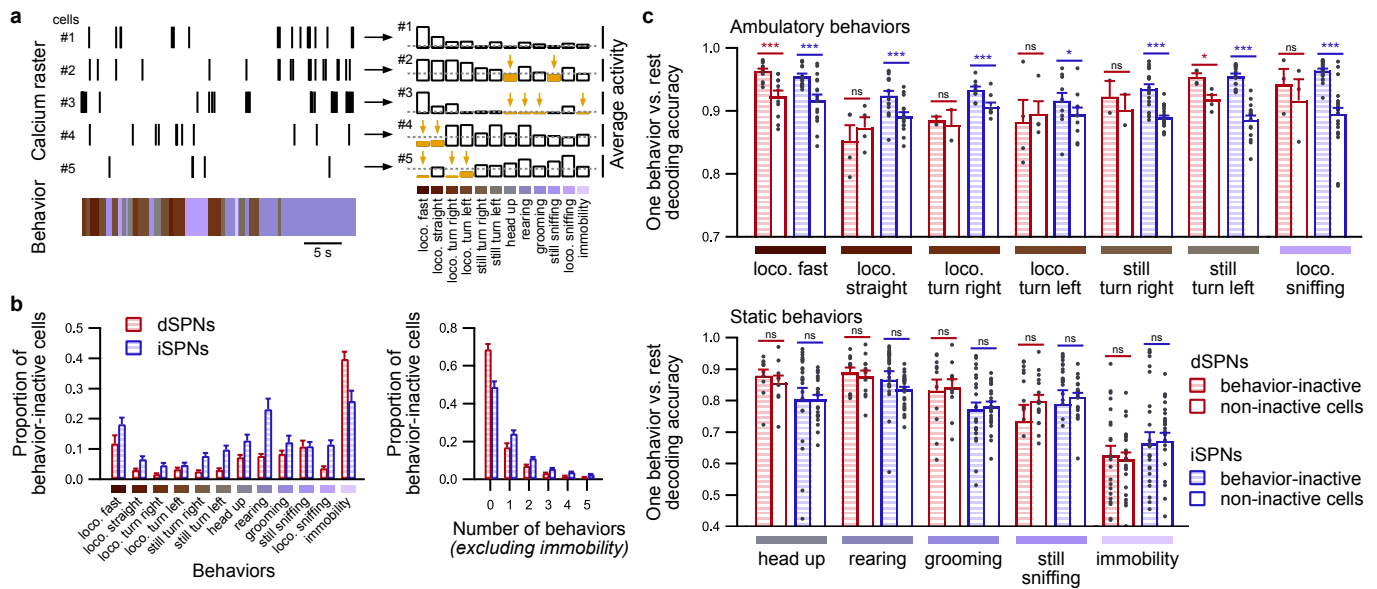

1  
2

3 **Extended Data Fig. 7: Contribution of behavior-inactive cells to neural code using an**  
4 **alternate definition.**

5 **a**, Behavior-inactive cells are identified according to their average activity during each  
6 behavior, as illustrated by 5 representative neurons (left panel) displaying different average  
7 activities for each behavior (right panel). The threshold for identifying an inhibited cell during  
8 a given behavior is set when the cell displays an average activity of less than 0.1 events/s  
9 (right panel, yellow bars).

10 **b**, Average fraction of dSPNs and iSPNs labeled behavior-inactive for each behavior (left  
11 panel) and average fraction of dSPNs and iSPNs labeled behavior-inactive during no behavior  
12 or one to five behaviors (right panel).

13 **c**, Simple matching coefficient for separating each behavior from other behaviors using  
14 neurons that are classified as either behavior-inactive during proper behavior (hatched bars)  
15 or non-behavior-inactive (unfilled bars) in dSPN (red; 29 sessions in 8 mice) or iSPN  
16 recordings (blue; n = 37 sessions from 9 mice) (behavior-inactive vs. non-behavior-inactive  
17 neurons: ns, p > 0.05, \* p < 0.05, \*\* p < 0.01, \*\*\* p < 0.001). The results are similar to those  
18 obtained when the neurons are classified as behavior-silent and non-behavior-silent.

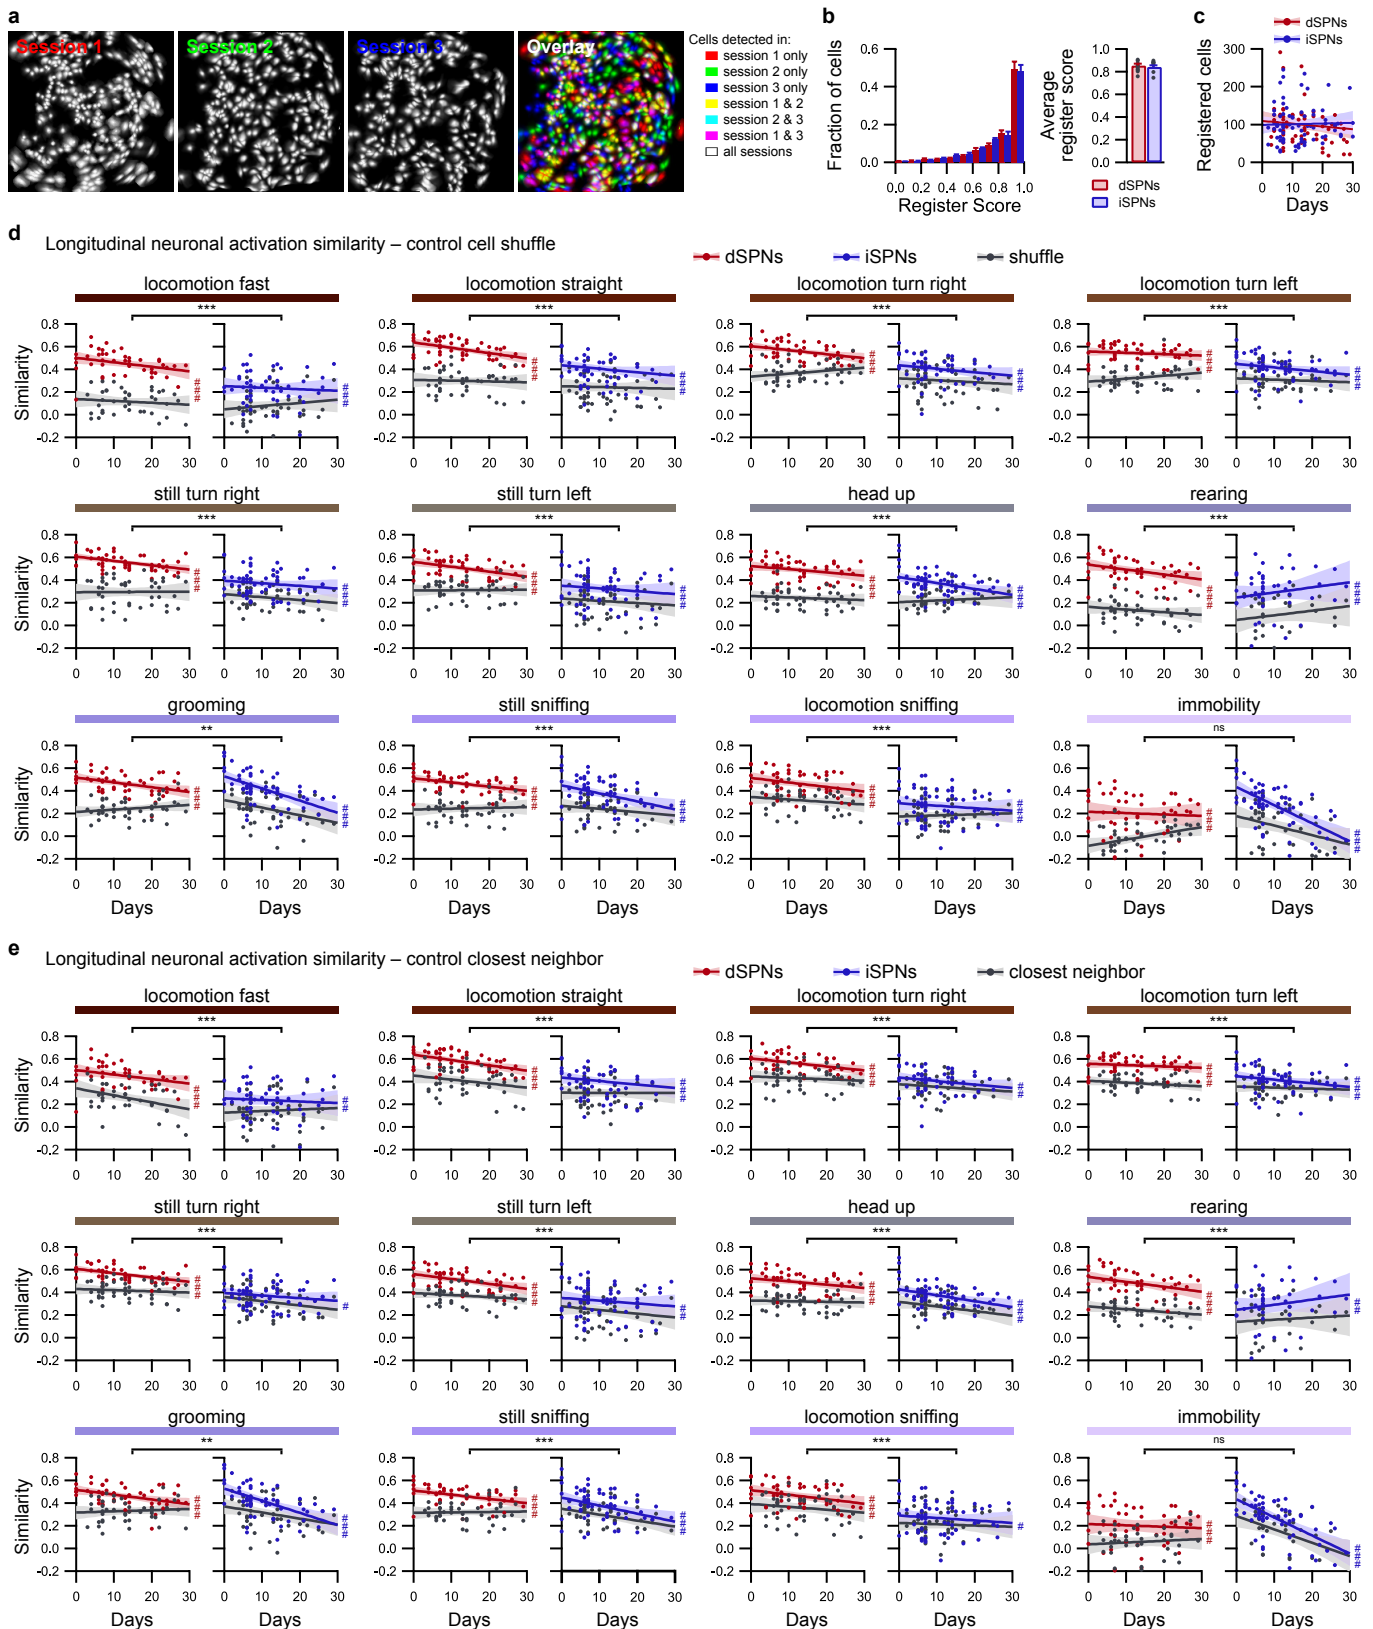

1  
2  
3  
4  
5  
6  
7

**Extended Data Fig. 8: Validation of longitudinal registration of cells and longitudinal evaluation of neuronal activation similarity during behaviors.**

**a**, Representative example of spatial footprints of neurons detected during three different sessions recorded from the same mouse and an overlay of the aligned spatial footprint maps, which are color-coded according to the sessions during which the cells were detected.

1 **b**, Distribution of register scores between sessions (left panel) and mean register score (right  
2 panel) averaged for all D1 (red; n = 8) and D2 (blue; n = 9) mice.  
3 **c**, Number of registered cells between pairs of sessions from the same mouse as a function of  
4 the number of days between sessions for dSPN (red; n = 72 pairs of sessions in 8 mice) and  
5 iSPN recordings (blue; n = 80 sessions in 9 mice).  
6 **d-e**, Evolution of the neuronal activation similarity during identified behaviors across days for  
7 dSPNs (red; n = 52 pairs of sessions in 8 mice) and iSPNs (blue; n = 62 pairs of sessions in 9  
8 mice) compared to their respective controls (gray), which were obtained by shuffling pairs of  
9 registered neurons (**d**) or by replacing one neuron in each pair of registered cells by its  
10 spatially closest neighbor (**e**) (dSPNs vs. iSPNs: ns p > 0.05, \*\* p < 0.01, \*\*\* p < 0.001; observed  
11 data vs. control: # p < 0.05, ## p < 0.01, ### p < 0.001).

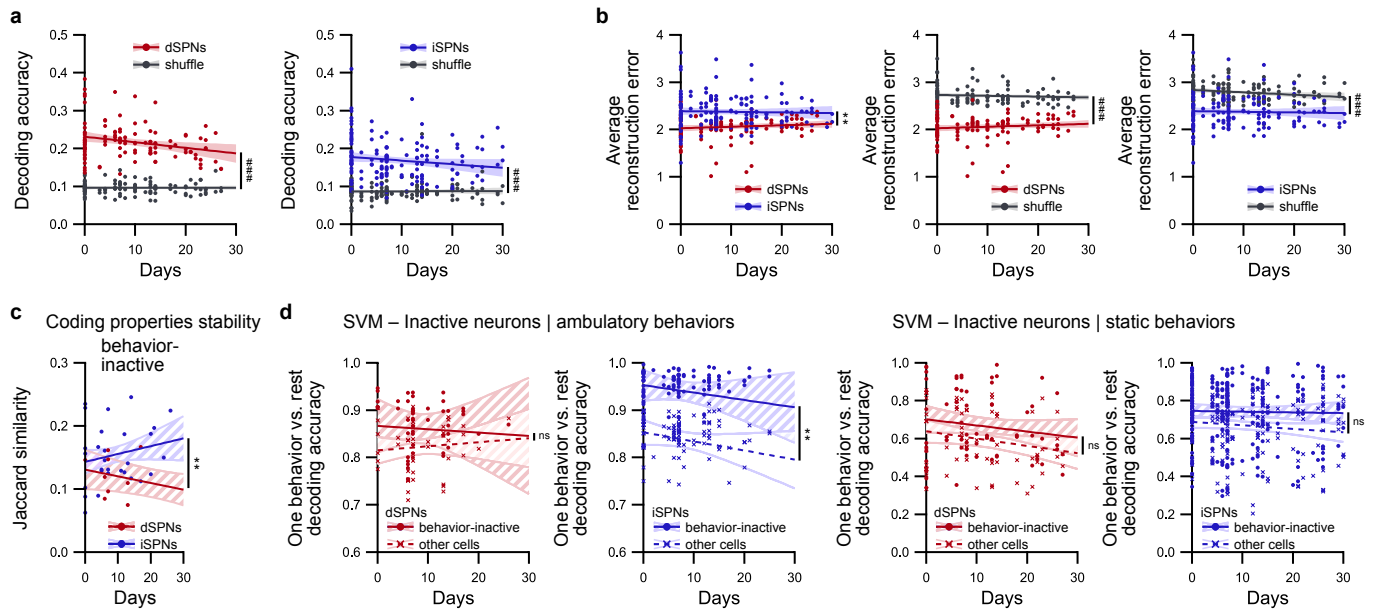

1

2

3 **Extended Data Fig. 9: Complements related to longitudinal prediction of behaviors.**

4 **a**, Accuracy in predicting the behavior according to the activity of longitudinally registered  
5 neurons using SVM classifiers trained on a different recordings for dSPNs (red; n = 121  
6 pairs of sessions) and iSPNs (blue; n = 171 pairs of sessions) and their respective controls, which  
7 were obtained using classifiers trained on time-lagged data (gray) (observed data vs. time-  
8 lagged: ### p < 0.001).

9 **b**, Average behavioral reconstruction error in predicting the behavior according to the activity  
10 of longitudinally registered neurons using SVM classifiers trained on different recordings for  
11 dSPNs (red; n = 121 pairs of sessions) and iSPNs (blue; n = 171 pairs of sessions) (dSPNs vs.  
12 iSPNs: \*\* p < 0.01; observed data vs. time-lagged: ### p < 0.001).

13 **c**, Quantification of the long-term stability of the coding properties of neurons using the  
14 Jaccard similarity coefficient between the binary classification of longitudinally registered  
15 labeled behavior-inactive in dSPN (red; n = 16 pairs of sessions meeting criterion) and iSPN  
16 recordings (blue; n = 29 pairs of sessions meeting criterion) (dSPNs vs. iSPNs: \*\* p < 0.01).

17 **d**, Simple matching coefficient for the long-term prediction of separating one behavior from  
18 other behaviors using neurons that were classified as behavior-inactive (circles, plain line,  
19 colored confidence interval) or non-behavior-inactive (crosses, dashed line, unfilled  
20 confidence interval) during this behavior, pooled for ambulatory behaviors (top panels) or  
21 static behaviors (bottom panels) for dSPNs (red; ambulatory: n = 20 pairs of sessions meeting  
22 criterion; static: n = 67 pairs of sessions meeting criterion) and iSPNs (blue; ambulatory: n =  
23 46 pairs of sessions meeting criterion; static: n = 75 pairs of sessions meeting criterion)  
24 (behavior-inactive vs. non-behavior-inactive: ns p > 0.05, \*\* p < 0.01). Note that the results  
25 obtained for behavior-inactive neurons are highly similar to those observed for behavior-  
26 silent neurons.

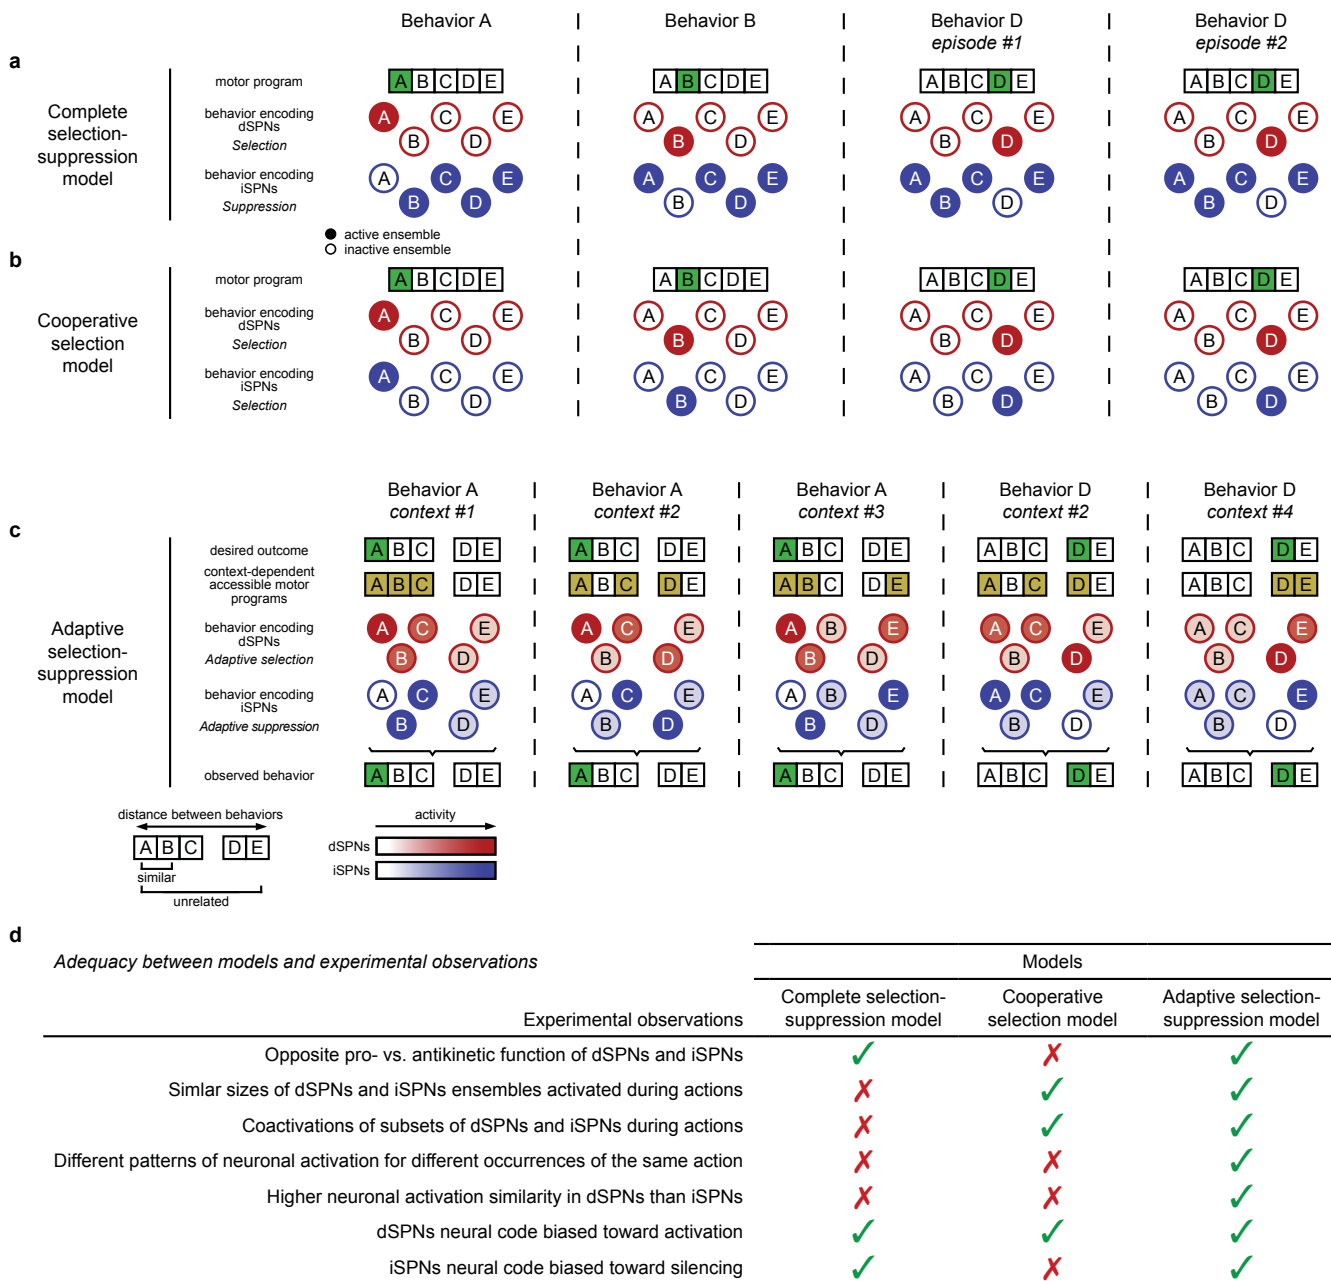

1  
2

### Extended Data Fig. 10: Comparison of theoretical models describing SPN encoding of behaviors.

Multiple models have been formulated to describe the organization of the basal ganglia and capture the properties of striatal neurons.

**a**, In the “complete selection-suppression” model<sup>17</sup>, subsets of dSPNs and iSPNs are concurrently activated during behaviors. While a specific subpopulation of dSPNs is activated to promote a given motor program, all iSPN subpopulations associated with other motor programs are active to simultaneously suppress these competing motor programs. This model predicts the widespread activation of iSPNs and the focused activation of specific dSPNs.

**b**, Alternatively, some models hypothesized a cooperative selection function for dSPNs and iSPNs based on concurrent coordinated activation in both pathways to select proper behaviors<sup>13</sup>. In this model, comparable populations of dSPNs and iSPNs are tuned toward specific behaviors and activated simultaneously to select proper motor programs. This model predicts a high and equivalent level of neuronal activation similarity in dSPNs and iSPNs

16

1 during episodes of the same behavior, as well as comparable neuronal activation similarities  
2 between behaviors in both SPN pathways.

3 **c**, In this study, we propose a new model, referred to here as the “adaptive selection  
4 suppression” model. We postulate that at any time, only a few reachable behaviors in the  
5 overall behavioral repertoire actual compete with the ongoing/most-desired behavior. These  
6 competing behaviors are highly dependent on the ongoing external context (and potentially  
7 dependent on the internal state of the animal) and thus differ between different episodes of a  
8 given behavior. We hypothesize that, as a result, dSPNs that encode the ongoing behavior and  
9 competing behaviors are activated, while dSPNs that encode other behaviors remain silent. At  
10 the same time, in the indirect pathway, iSPNs specifically associated with competing  
11 behaviors are activated to suppress these competing behaviors, while iSPNs associated with  
12 the ongoing behavior remain silent. As a consequence, the activations in the direct and  
13 indirect pathways, which select and suppress motor programs, respectively, result in the  
14 proper selection of only one ongoing motor program.

15 **d**, When assessing the adequacy between model predictions and experimental observations,  
16 we trust that the adaptive selection-suppression model captures more SPN properties, as  
17 established in previous studies. First, despite its accurate account of the antagonistic function  
18 of dSPNs and iSPNs<sup>4-10</sup>, which implies a bias in the neural code toward activation and  
19 inhibition, respectively, the complete selection-suppression model proposes the widespread  
20 activation of iSPNs and focused activation of dSPNs during actions, which is not supported by  
21 recordings of neuronal activity<sup>11-16</sup>. Additionally, this model cannot explain the differences in  
22 neuronal activation similarity we observed in the present study, as this model predicts that  
23 populations of neurons that are activated during episodes of the same behaviors are highly  
24 similar for dSPNs and iSPNs and almost identical when comparing dSPNs and iSPNs.  
25 Furthermore, the cooperative selection model properly captures the simultaneous and  
26 targeted activation of subsets of dSPNs and iSPNs during actions<sup>12-14</sup>. However, this model  
27 does not explain the antagonistic functions of dSPNs and iSPNs, and because it proposes  
28 similar neuronal activation patterns for both dSPNs and iSPNs, it does not account for the  
29 differences in the tuning properties in the two pathways we observed in this study. Our  
30 proposed novel adaptive selection-suppression formulation aims to reconcile some of the  
31 above discrepancies. This model accounts for the prokinetic and antikinetic effects associated  
32 with activating dSPNs and iSPNs, respectively. This finding is supported by our observation  
33 that the neural code for behaviors is biased toward activation in dSPNs and silencing in iSPNs.  
34 Importantly, by incorporating the idea that neuronal activation patterns during self-paced  
35 spontaneous exploration of the behavioral repertoire are highly dependent on the current  
36 external and internal contexts, we propose that dSPNs and iSPNs activated during different  
37 occurrences of the same behavior differ. This result supports the context-dependent  
38 variability in activation patterns that we observed using the neuronal activation similarity  
39 measure. Moreover, the neuronal clusters in dSPNs that are associated with the ongoing  
40 behavior are consistently active, whereas there may be instances when, for the same observed  
41 behavior, the sets of activated iSPNs drastically differ (to inhibit different competing  
42 behaviors; see, for example, behavior A context #1 vs. behavior A context #3); thus, the  
43 proposed model predicts a higher neuronal activation similarity in dSPNs than in iSPNs. In  
44 addition, our model incorporates an important feature of the neural code, namely, that in

- 1 response to the expressed motor program, specific subgroups of dSPNs are activated, whereas
- 2 specific subgroups of iSPNs are consistently inactive.

## 1 **METHODS:**

### 3 **Animal care and use.**

4 All procedures were performed according to the Institutional Animal Care Committee  
5 guidelines and were approved by the Local Ethical Committee (Comité d’Ethique et de Bien-  
6 Être Animal du pôle santé de l’Université Libre de Bruxelles (ULB), Ref. No. 646 N). Mice were  
7 maintained on a 12-hour dark/light cycle (lights on at 8 pm) with *ad libitum* access to food  
8 and water. The room temperature was set to  $22 \pm 2$  °C with constant humidity (40–60%). The  
9 behavioral tests were performed during the dark photoperiod. Both male and female  
10 transgenic mice ( $\geq 8$  weeks) were used in all behavioral experiments.

### 12 **Transgenic mouse generation.**

13 The genetic background of all transgenic mice used in this paper is C57Bl/6J. The mice were  
14 heterozygous and maintained by breeding with C57Bl/6 mice. All lines were backcrossed with  
15 C57Bl6 mice for at least 8 generations. Three transgenic mouse lines were used:  $A_{2A}$ -Cre<sup>7</sup>,  $D_1$ -  
16 Cre (EY262; GENSAT)<sup>44</sup> and Ai162/TIT2L-GC6s-ICL-tTA2 (Ai162D; Allen Institute)<sup>45</sup>. Simple  
17 transgenic  $A_{2A}$ -Cre or  $D_1$ -Cre mice (A2A(AAV) and D1 mice, respectively) were used for the  
18 virally mediated targeting of iSPNs or dSPNs, respectively. Double transgenic  $A_{2A}$ -Cre x  
19 Ai162/TIT2L-GC6s-ICL-tTA2 mice (A2A(Tg) mice) were generated by breeding and used for  
20 targeting iSPNs without virus injection. For this breeding, mice were maintained with  
21 doxycycline food pellets (A03 1 g/kg doxycycline hyclate pellet; SAFE, France) to prevent  
22 GCaMP6s expression during development and early life stages in offspring. Standard food was  
23 introduced when offspring were weaned (3 weeks postnatal). The results of  $A_{2A}$ -Cre mice  
24 expressing GCaMP6s through a virus-mediated strategy (A2A(AAV) mice) or through a double  
25 transgenic strategy (A2A(Tg) mice) were compared, and no differences were observed  
26 (Extended Data Fig. 2g-h, k). As a consequence, these animals were pooled.

### 28 **Viral injections and chronic lens implantation.**

29 Under isoflurane anesthesia (induction 4%, maintenance 1% in O<sub>2</sub>; 0.5 L/min), male and  
30 female  $A_{2A}$ -Cre and  $D_1$ -Cre mice ( $\geq 8$  weeks old), which targeted iSPNs and dSPNs,  
31 respectively, received two injections (500 nL per site at 100 nL/min) under stereotaxic  
32 control in the dorsal striatum (AP: +1.2 mm; ML: -1.75 mm; DV: -3 mm; and AP: +1.2 mm; ML:  
33 -1.75 mm; DV: -3.3 mm relative to Bregma) of a Cre-dependent virus encoding GCaMP6s  
34 (AAV-Dj-EF1 $\alpha$ -DIO-GCaMP6s; Stanford Vector Core, titer  $5.02 \times 10^{12}$  vg/ml; UNC Vector Core,  
35 titer  $3.9 \times 10^{12}$  vg/ml), which was delivered through a cannula connected to a Hamilton  
36 syringe (10  $\mu$ L) placed in a syringe pump (KDS-310-PLUS, KDScientific). Cannulas were  
37 lowered into the brain and left in place for 10 min after infusion. Mice (4–5 weeks after virus  
38 injection or  $\geq 8$  weeks old for A2A(Tg) mice) were then prepared for in vivo calcium imaging.  
39 A gradient index (GRIN) lens (1.0 mm or 0.6 mm diameter, ID-1050-004605 or ID-1050-  
40 004608; Inscopix, Palo Alto, CA) was implanted into the dorsal striatum under stereotaxic  
41 control directly above the injection site (AP: +1.2 mm; ML: -1.9 mm; DV: -2.8 mm relative to  
42 Bregma). Once the lens was positioned, the lens was secured to the skull using Metabond  
43 (C&B, Sun Medical Co. Ltd, Japan) and protected using tape. Two weeks after lens  
44 implantation, a microendoscope baseplate (ID-1050-004638; Inscopix) was attached to the  
45 skull with Metabond in the optimal imaging plane (550  $\mu$ m above the lens for the 0.6 mm



1 diameter lens and ~300  $\mu\text{m}$  above the lens for the 1.0 mm diameter lens). The behavioral  
2 experiments began at least one week after the baseplate was fixed to ensure that the field of  
3 view was adequately cleared.

4

### 5 **Open-field behavior.**

6 The behavior experiments were conducted in an open field arena (40 cm x 40 cm x 40 cm,  
7 length x width x height) with white walls in a dark environment (0 lux). Before the first  
8 recording session, mice were habituated to the open field and the microendoscope for at least  
9 5 consecutive days by using a dummy microscope (ID-1050-003762; Inscopix) mounted in  
10 place of the actual microscope. The animal behavior was recorded for 30 min for 4–5 sessions  
11 spaced over 5–7 days using a camera (sampling rate: 40 fps) mounted on the ceiling  
12 approximately 1.5 m above the arena controlled through EthoVision XT14 (Noldus). One  
13 photon calcium imaging was sampled at 20 fps using a nVista 3.0 microendoscope (Inscopix).  
14 A commutator (Inscopix) attached to the ceiling was placed between the camera and the  
15 acquisition box to minimize cable entanglement. To prevent photobleaching, calcium frames  
16 were acquired with a 2 min OFF / 3 min ON pattern, and time synchronization between the  
17 calcium recordings and open-field videos was programmed and managed through EthoVision  
18 XT14.

19 At the end of some recording sessions, mice received an intraperitoneal (i.p.) injection of  
20 either saline or amphetamine (3 mg/kg in saline) and were immediately placed back into the  
21 open-field arena for an additional 45 min of behavior and calcium imaging following the same  
22 acquisition protocol. Amphetamine treatment always occurred on the last day of recording to  
23 prevent any effect on neuronal activity due to the long-lasting effects of amphetamine.

24

### 25 **Histology.**

26 After the behavioral experiments were completed, mice were deeply anesthetized with  
27 avertin (2,2,2-tribromoethanol 1.25%, 2-methyl-2-butanol 0.78%; 20  $\mu\text{L}/\text{g}$ , i.p.; Sigma Aldrich)  
28 and transcardially perfused with PBS followed by 4% paraformaldehyde in PBS. Brain were  
29 removed and postfixed overnight at 4°C. Then, 40- $\mu\text{m}$  coronal slices containing the striatum  
30 were cut with a vibratome (VT1000 S; Leica) and stored in PBS. Sections were washed for 10  
31 min in PBS, incubated for 10 min with Hoechst 33258 (1:10000 in PBS), and mounted on glass  
32 slides and coverslipped with Fluoromount. Slices were imaged using a microscope (V16;  
33 Zeiss) confirming for all mice the adequate localization of the lens in the dorsal striatum.

34

### 35 **Identification of behaviors.**

36 To identify the behaviors that mice displayed during open-field explorations recorded  
37 through EthoVision XT14 (Noldus), we combined deep learning tools and clustering methods  
38 to generate a predictive model for labelling behaviors. First, the x-y coordinates of different  
39 mouse body parts (nose, neck, left ear, right ear, microendoscope camera, body center, tail  
40 start, and tail end) were identified using a DeepLabCut<sup>46</sup> deep neural network trained using  
41 800 randomly selected and manually annotated frames taken from 40 different videos. The  
42 training regimen was set to the DeepLabCut default<sup>46</sup>. Any coordinate detected by  
43 DeepLabCut with a likelihood of less than 0.9 was removed from further analysis. For each  
44 video frame, the above body parts were used compute six features describing the mouse  
45 posture: the *body speed*, which was computed as the projection of the body center speed

1 vector along the mouse body axis; the *head speed*, which was defined as the norm of the  
2 difference between the body center speed vector and the camera speed vector; the *movement*  
3 *angle*, which was calculated as the angle between the body center speed vector in the previous  
4 and subsequent frames; the *body length*, which was calculated as the sum of the distance  
5 between the neck and body center and the distance between the body center and tail start;  
6 the *neck elongation*, which was measured as the distance between the neck and body center;  
7 and the *head elevation*, which was calculated as the distance between the neck and the point  
8 defined by the orthogonal projection of the camera position along the vector orthogonal to the  
9 vector defined by ears positions. The temporal evolution of these six features was smoothed  
10 over 20 frames. Then, using a quarter of the data points, a nonlinear dimension reduction  
11 algorithm (t-distributed stochastic neighbor embedding, t-SNE) was applied to identify potent  
12 clusters in 3 dimensions. Ten replications of the t-SNE algorithm were computed for the same  
13 data. The clusters were then identified using a Gaussian mixture model (GMM). Fifty  
14 replications of the GMM clustering with random initializations were calculated for each  
15 individual t-SNE replicate. The resulting 500 classifications of the frames were subsequently  
16 clustered using the Hamming distance to identify groups of frames that were consistently  
17 classified together by the tSNE and GMM methods. Clusters with less than 20 frames were  
18 removed. The remaining clusters were merged in ascending order using the Wasserstein  
19 distance (aka earth mover's distance) until a cutoff of 1 was reached. The resulting clusters  
20 were manually registered by visually inspecting the corresponding video frames and  
21 evaluating the distribution of cluster elements in the feature space as one of the following  
22 behaviors: *locomotion fast* (body speed greater than  $\sim 15$  cm/s); *locomotion straight* (nonzero  
23 body speed, movement angle of approximately 0); *locomotion turn right* (nonzero body speed,  
24 nonzero positive movement angle); *locomotion turn left* (nonzero body speed, nonzero  
25 negative movement angle); *still turn right* (body speed of approximately 0 cm/s, nonzero  
26 positive movement angle); *still turn left* (body speed of approximately 0 cm/sec, nonzero  
27 negative movement angle); *head up* (body speed of approximately 0 cm/s, small neck  
28 elongation, high head elevation); *rearing* (body speed of approximately 0 cm/s, small body  
29 length, small neck elongation, high head elevation); *grooming* (speed of approximately 0 cm/s,  
30 nonzero camera speed, small body length, large movement angle variations); *locomotion*  
31 *sniffing* (nonzero body speed, large body length, high neck elongation); *still sniffing* (body  
32 speed of approximately 0 cm/s, large body length, high neck elongation); or *immobility* (body  
33 speed of approximately 0 cm/s, camera speed approximately of 0 cm/s). Finally, using these  
34 defined clusters and their distributions in the feature space, we evaluated for each frame its  
35 likelihood of belonging to each behavior cluster. The behavior was determined according to  
36 the highest likelihood. Any behavior episode of less than 100 ms (i.e., 4 frames) was removed.  
37 In cases in which some video frames were unlabeled, the first half of these series were  
38 attributed to the previous behavior, while the second half was attributed to the following  
39 behavior. The resulting identification of spontaneous mouse behavior in the open field  
40 exploration was systematically visually inspected to ensure proper classification.

#### 41 42 **Calcium signal extraction, deconvolution and longitudinal cell registration.**

43 The calcium movies were preprocessed for spatial binning (downsampled by 4; OpenCV,  
44 Python) and subsequently motion-corrected and analyzed using CalMan<sup>18</sup> to take advantage  
45 of the capabilities offered by the constrained nonnegative matrix factorization for endoscopic

1 data (CNMF-E) algorithm to estimate and correct for background neuron somata<sup>19</sup>. The  
2 temporal CNMF-E components were manually curated to remove components with poor  
3 signal-to-noise ratios (peak-to-noise ratio of less than  $\sim 3$ ), large baseline fluctuations, or  
4 inappropriate spatial footprints. The selected temporal calcium components were also  
5 deconvolved to estimate spike trains in the calcium measurements using MLspike<sup>20</sup>. To  
6 register cells across imaging sessions for the same animal, we used CellReg<sup>29</sup>, which uses a  
7 probabilistic method to automatically register cells that are present in two or more recordings  
8 from the same mouse.

9 To control for longitudinal registration, two control lists of registered pairs of cells between  
10 pairs of sessions were generated: the first relied on a random shuffling of registered neurons  
11 in one of the two sessions, while the second relied on replacing all the neurons identified in  
12 one of the two sessions with their closest neighbor.

13

#### 14 **Quantification of neuronal activation similarity and behavioral similarity.**

15 Two measures of neuronal similarity were used: the first compared the neuronal activation  
16 during each behavior over time during one recording session (or between recording sessions  
17 using pairs of longitudinally registered cells present in both sessions), while the second  
18 compared neuronal activation between different behaviors within a given recording session.

19 For the measure of the neuronal activation similarity for each behavior during one session (30  
20 min long), we first split this session into two 15-min halves. For each time period, we  
21 calculated for each behavior the average value over time (15 min) of the deconvolved activity  
22 for each neuron, denoted as  $\mathbf{X}_1$  and  $\mathbf{X}_2$ . The similarity was evaluated as  $1 - \frac{\|\mathbf{X}_1 - \mathbf{X}_2\|}{\|\mathbf{X}_1\| + \|\mathbf{X}_2\|}$ , where  $\|\mathbf{X}\|$  is the Euclidean norm of  $\mathbf{X}$ . As a control, the same similarity metric was  
23 computed by calculating  $\mathbf{X}_1$  and  $\mathbf{X}_2$  based on all possible partitions of 30 min into two periods  
24 using 5-min-long segments. We also calculated the neuronal similarity between odd and even  
25 frames by computing  $\mathbf{X}_1$  and  $\mathbf{X}_2$  in odd and even calcium frames. Finally, the neuronal  
26 activation similarity was also evaluated for each behavior by calculating  $\mathbf{X}_1$  in one episode  
27 every two episodes and calculating  $\mathbf{X}_2$  in the remaining episodes of each behavior. The spatial  
28 shuffle similarity was calculated as the mean of 10 random permutations of indices from  $\mathbf{X}_2$ .

29 In addition, the neuronal activation similarity between pairs of behaviors was calculated using  
30 the same formula as above. The average neuronal activity for each behavior was calculated  
31 over the duration of the entire session (30 min) except otherwise mentioned, and the  
32 similarity was computed for each pair of behaviors. The distance between behaviors  
33 (behavioral distance) was estimated for each pair of identified behaviors as the summation of  
34 the Wasserstein distances for each of the six features describing the mouse posture (body  
35 speed, head speed, movement angle, body length, neck elongation, and head elevation). The  
36 similarity between behaviors (behavioral similarity) was calculated as the opposite of the  
37 behavioral distance. Similar results were obtained using similarity metrics based on the  
38 Wasserstein distance or Bhattacharyya distance. To evaluate the relationship between the  
39 neuronal activation similarity and the behavioral similarity, we used the Spearman  
40 correlation coefficient.

41 For all of the above experiments, if the sampling duration over which the average activity was  
42 computed was less than 5 s, the data were excluded from further analyses.

43

#### 44 **Support vector machine decoding of behavior based on SPNs activity.**

1 To decode behaviors based on neuronal activity, we trained a set of binary support vector  
2 machine (SVM) classifiers for multiclass classification using the one-vs.-one strategy (scikit-  
3 learn Python package)<sup>47</sup>. The training was performed using 5-fold cross validation to predict  
4 the detected behavior time series, with the deconvolved calcium activity convolved over a 500  
5 ms square window. The outputs of the classifiers were combined, and the behavior with the  
6 highest number of votes was identified as the most likely behavior. The decoding accuracy  
7 was estimated as the fraction of time bins during which the predicted behavior corresponded  
8 to the observed behavior. The behavior reconstruction error was calculated using the  
9 behavior distance between the predicted and observed behaviors. Alternatively, to estimate  
10 the capability of SVM classifiers to separate one given behavior from any other behavior,  
11 which is referred in the text as one behavior vs. rest decoding, we calculated the accuracy as  
12 the simple matching coefficient between the observed and predicted behaviors (i.e., the true  
13 positive prediction for this behavior and the true negative prediction for this behavior).  
14 The chance level for the decoding performance was obtained by training SVM classifiers on  
15 time-lagged data. Briefly, we flipped the behavior time series (the first element becomes the  
16 last and vice versa) and applied a cyclic permutation with a random time lag. This procedure  
17 destroys the relationships between the behavior and calcium activity time series but  
18 preserves the time correlations of the neural activity time series. For each recording session,  
19 10 random time lags were used. For each random time lag, we trained a new set of SVM  
20 classifiers and evaluated its performance in predicting the original behavior using the original  
21 calcium time series. When plotted, the individual points for SVM decoding based on the  
22 shuffled data represent the average of the 10 random time lags.  
23 For longitudinal predictions between pairs of recording sessions, the SVM classifiers were  
24 trained on one session using only neurons that were registered in these two sessions and the  
25 corresponding behavior time series. The decoding performance was evaluated using calcium  
26 events from the second session of cells registered in both sessions. If less than 40 neurons  
27 were identified in both sessions, the analysis was discarded.

28

### 29 **Detection of behavior-active neurons.**

30 To characterize the statistical significance of neuronal activation during identified behaviors,  
31 we employed a behavior information criterion that was calculated as the mutual information  
32 score between the calcium event occurrence and the mouse behavior. The behavior  
33 information for each cell was calculated using the following formula:

$$BI = \sum_{i=1}^N p_i \frac{f_i}{f} \log_2 \frac{f_i}{f}$$

34 where  $i$  is the behavior,  $p_i$  is the fraction of time spent performing behavior  $i$ ,  $f_i$  is the average  
35 event frequency during behavior  $i$ , and  $f$  is the overall average event frequency. We corrected  
36 this measure for sampling bias in the information measures by using shuffled distributions of  
37 the events. For each cell, we generated 1000 random permutations of the events and  
38 calculated a behavior information value for each permutation, thus generating 1000 random  
39 behavior information values to which the actual behavior information value was compared.  
40 We labeled a cell as a behavior-active cell if the behavior information value was more than 4  
41 sigma from the shuffled distribution (significance of BI above 4)<sup>25,26</sup>.

1 When this method was used in conjunction with SVM-based predictions, analyses were  
2 discarded if less than 40 neurons were labeled as behavior-active in a given session.

3  
4 **Detection of behavior-silent (and behavior-inactive) neurons.**

5 To characterize cells that were consistently silent during a given behavior, we calculated for  
6 each neuron and each behavior the average event rate for all episodes of this behavior. We  
7 then evaluated for each cell and each behavior an activation occurrence value, which  
8 described how often this neuron was active during episodes of this behavior (event rate > 0).  
9 For each behavior, a neuron was labeled as behavior-silent if its activation occurrence was  
10 less than 0.025. Alternatively, for each behavior, we labeled a cell as behavior-inactive if its  
11 average event rate during this behavior was less than 0.1 Hz.

12 When this method was used in conjunction with SVM-based predictions, analyses were  
13 discarded if less than 20 neurons were labeled as behavior-silent (or behavior-inactive) in a  
14 given session.

15  
16 **Quantification and statistical report.**

17 Unless otherwise stated, the mean  $\pm$  standard error of the mean (SEM) was used to report  
18 data. For all statistics, we used a linear mixed-effects model followed by analysis of variance  
19 to account for between-subject and within-subject effects in the case of incomplete design  
20 (exclusion criteria mentioned in the above sections). To compare the dSPN and iSPN groups,  
21 post hoc analyses were performed using permutation-based t tests. For hypothesis testing,  
22 the significance was set to 0.05. Statistical analyses were performed in MATLAB (MathWorks).  
23 Animals were excluded prior to data acquisition if the imaging quality or focal plane were  
24 poor or after acquisition but before secondary analyses if movement artifacts were impossible  
25 to correct using CaImAn. The details of the statistical procedures and results are provided in  
26 Supplementary Table 1.
